# Supplementary material
Source: PubMed Central journal article supplement (PMC8948167)
Supplement: mmc1.pdf [file mmc1.pdf]

**The American Journal of Human Genetics, Volume 109**

**Supplemental information**

**GWAS of longitudinal trajectories at biobank scale**

**Seyoon Ko, Christopher A. German, Aubrey Jensen, Judong Shen, Anran Wang, Devan V. Mehrotra, Yan V. Sun, Janet S. Sinsheimer, Hua Zhou, and Jin J. Zhou**

# Supplemental Material for “GWAS of Longitudinal Trajectories at Biobank Scale”

Seyoon Ko<sup>1,2,8</sup>, Christopher A. German<sup>2,8</sup>, Aubrey Jensen<sup>2</sup>,  
Judong Shen<sup>3</sup>, Anran Wang<sup>3</sup>, Devan V. Mehrotra<sup>3</sup>, Yan V. Sun<sup>4</sup>, Janet S. Sinsheimer<sup>1,2,5</sup>,  
Hua Zhou<sup>1,2,\*\*</sup>, Jin J. Zhou<sup>2,6,7,\*</sup>

---

<sup>1</sup>Department of Computational Medicine, University of California, Los Angeles, CA 90095, U.S.A.

<sup>2</sup>Department of Biostatistics, University of California, Los Angeles, CA 90095, U.S.A.

<sup>3</sup>Biostatistics and Research Decision Sciences, Merck & Co., Inc., Kenilworth, NJ 07033, U.S.A.

<sup>4</sup>Department of Epidemiology, Emory University, Atlanta, GA 30322, U.S.A.

<sup>5</sup>Department of Human Genetics, University of California, Los Angeles, CA 90095, U.S.A.

<sup>6</sup>Department of Medicine, University of California, Los Angeles, CA 90095, U.S.A.

<sup>7</sup>Department of Epidemiology and Biostatistics, University of Arizona, Tucson, AZ 85721, U.S.A.

<sup>8</sup>These author contributed equally to this work.

\*Correspondence: jinjinzhou@ucla.edu

\*\*Correspondence: huazhou@ucla.edu

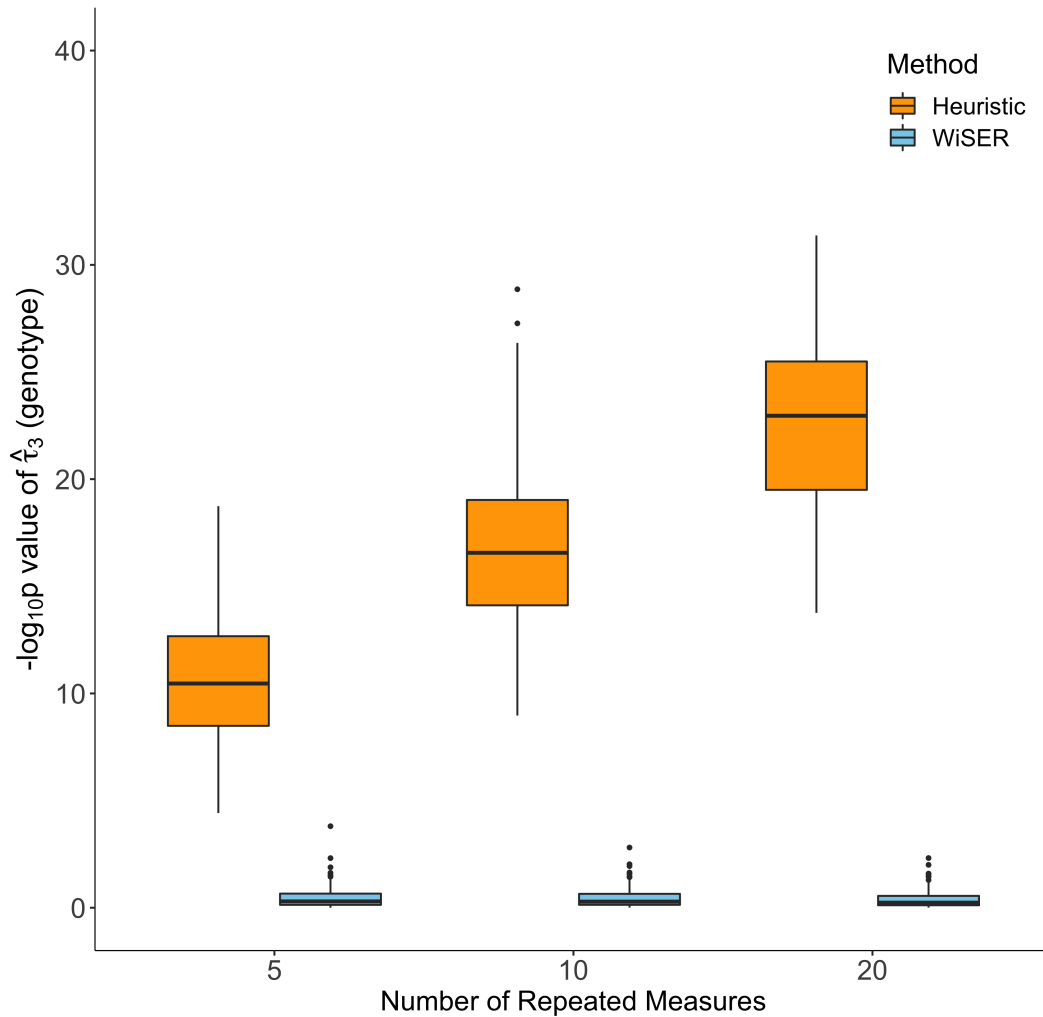

Figure S1: **Boxplots of  $-\log_{10}(\text{p values})$  for testing a null effect genotype by WiSER (adjusting for time-varying covariates) and the heuristic method of using standard deviation of the residuals as the outcome**

The sample size is  $m = 6,000$  and the number of replicates is 100. The heuristic method leads to incorrect inference – false positives due to systematically inflated p values.

Score test for  $\beta_g$  without SPA,  $m = 6,000$

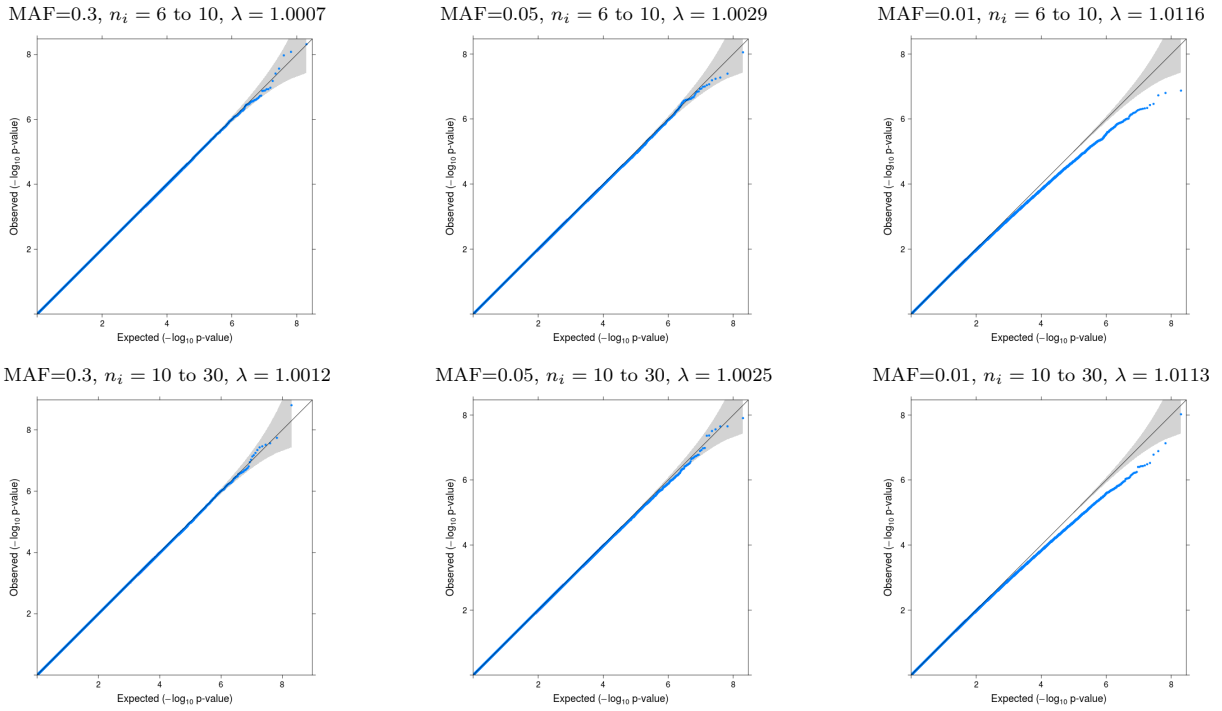

Score test for  $\beta_g$  with SPA,  $m = 6,000$

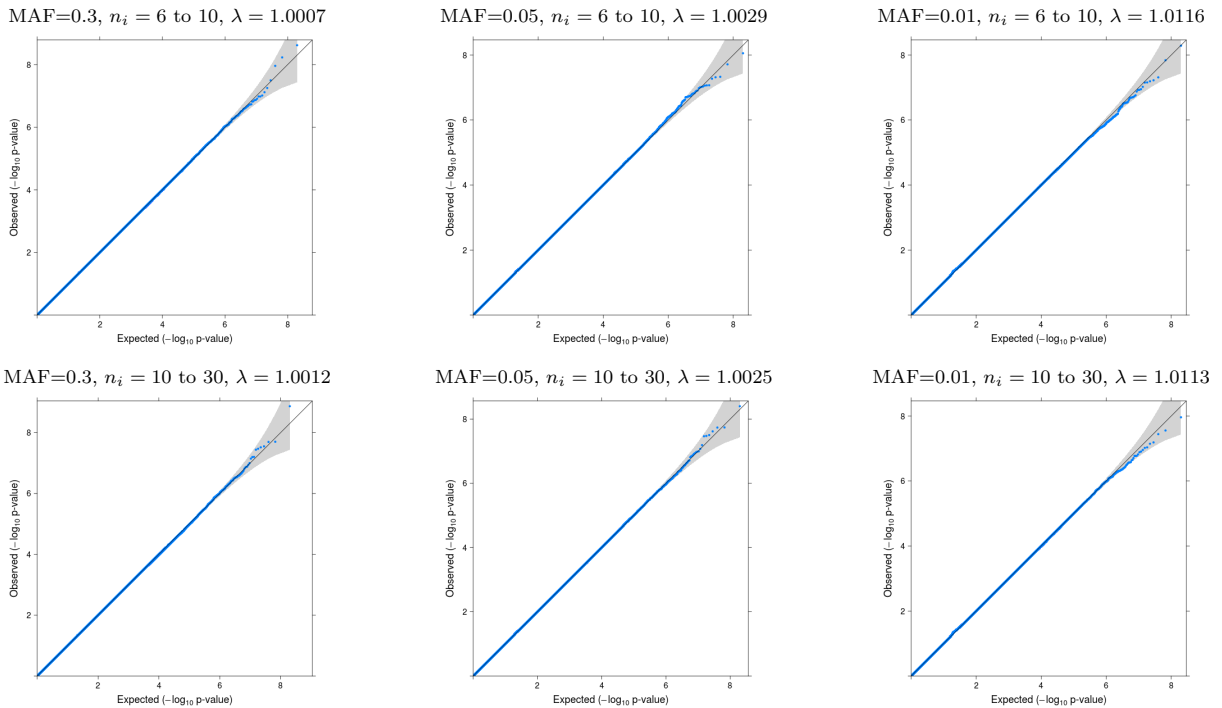

Figure S2: **Quantile-Quantile (QQ) plots of p values for testing  $\beta_g$  from the score test and SPA of the simulation studies,  $m = 6,000$**

QQ plots from score test without SPA (row 1-2) and SPA (row 3-4) for testing  $\beta_g$ , where  $m = 6,000$ ,  $n_i = 6$  to 10 (row 1 and row 3) and  $n_i = 10$  to 30 (row 2 and row 4), MAF = 0.3 (column 1), 0.05 (column 2), and 0.01 (column 3), based on  $10^9$  replicates.

Score test for  $\tau_g$  without SPA,  $m = 6,000$

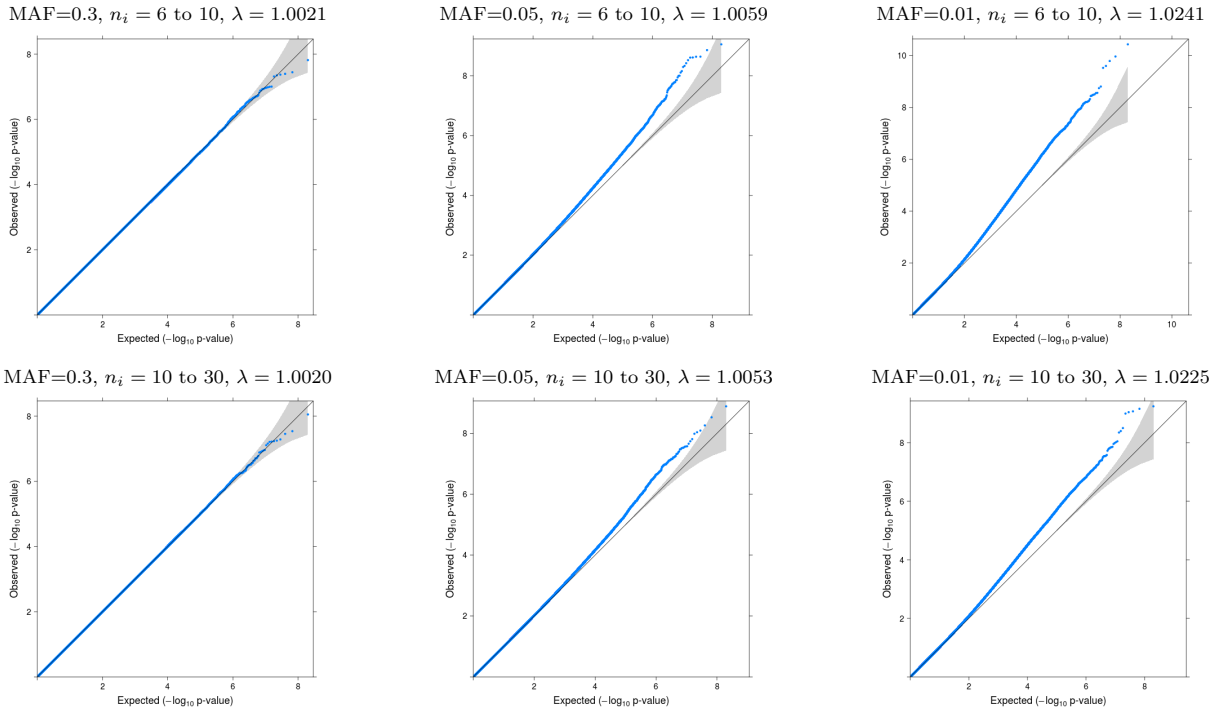

Score test for  $\tau_g$  with SPA,  $m = 6,000$

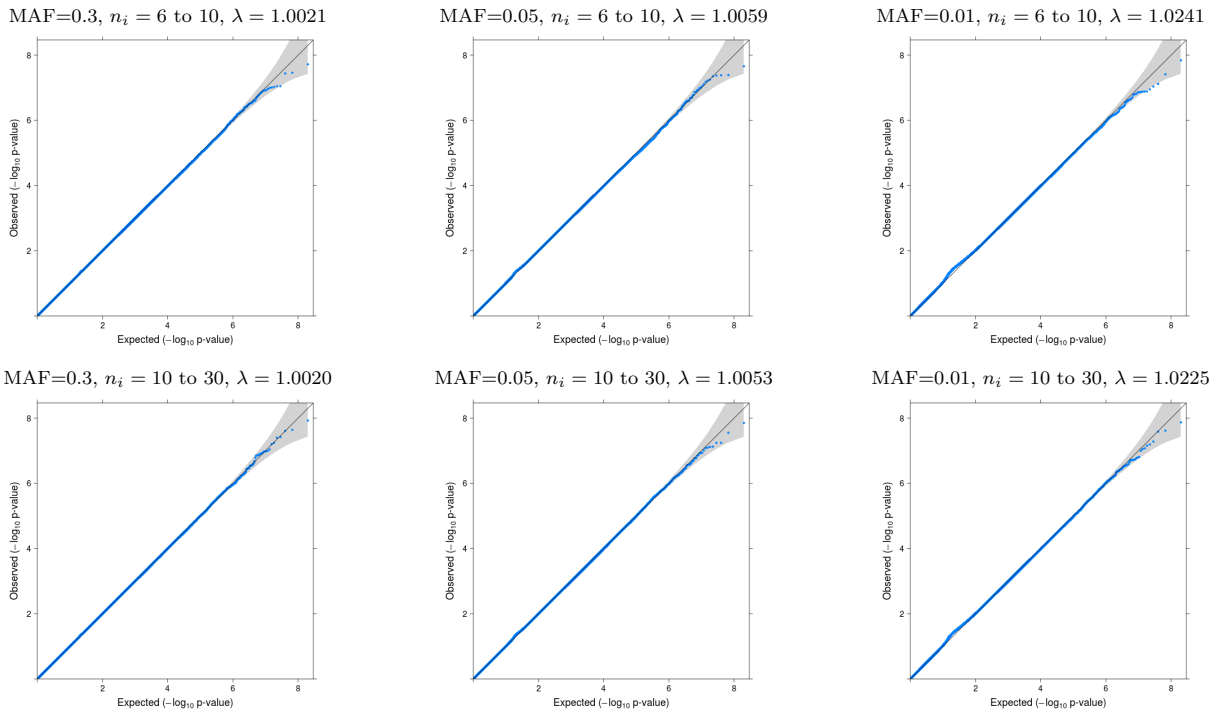

Figure S3: **Quantile-Quantile (QQ) plots of p values for testing  $\tau_g$  from the score test and SPA of the simulation studies,  $m = 6,000$**

QQ plots of p values from score test (row 1-2) and SPA (row 3-4) for testing  $\tau_g$ , where  $m = 6,000$ ,  $n_i = 6$  to 10 (row 1 and row 3) and  $n_i = 10$  to 30 (row 2 and row 4), MAF = 0.3 (column 1), 0.05 (column 2), and 0.01 (column 3), based on  $10^9$  replicates.

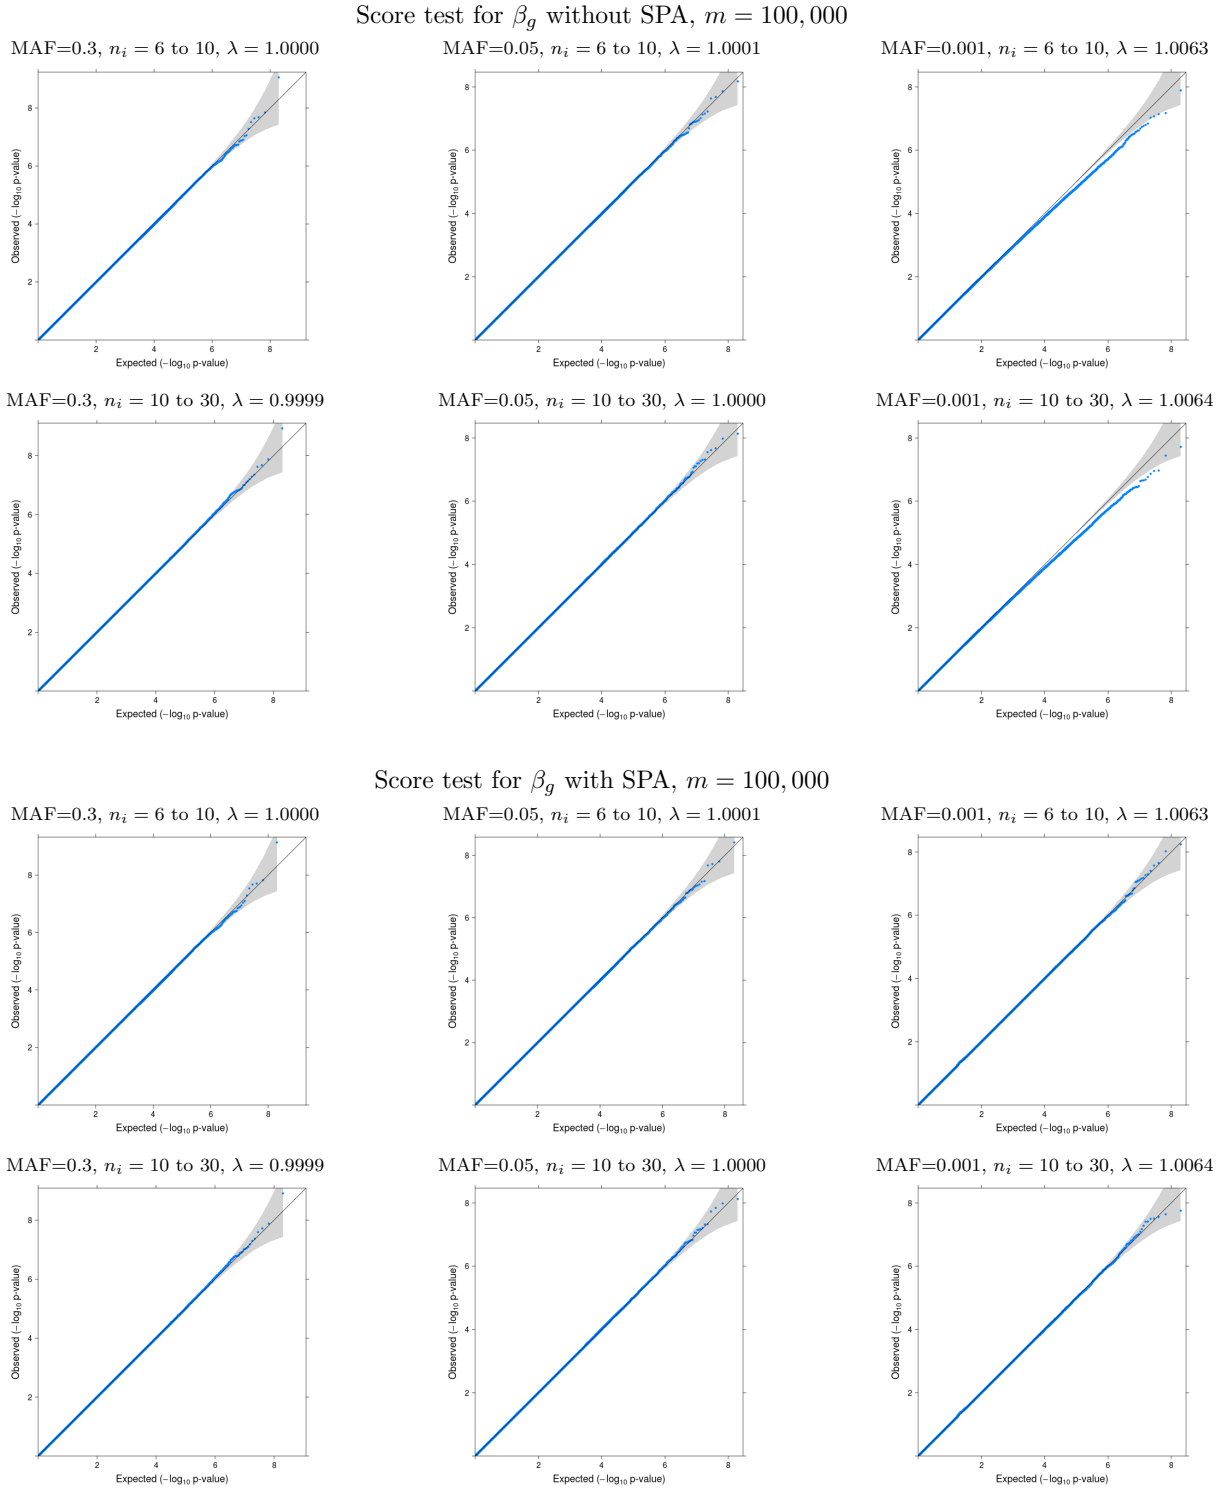

Figure S4: **Quantile-Quantile (QQ) plots of p values for testing  $\beta_g$  from the score test and SPA of the simulation studies,  $m = 100,000$**

QQ plots of p values from score test (row 1-2) and SPA (row 3-4) for testing  $\beta_g$ , where  $m = 100,000$ ,  $n_i = 6$  to 10 (row 1 and row 3) and  $n_i = 10$  to 30 (row 2 and row 4), MAF = 0.3 (column 1), 0.05 (column 2), and 0.001 (column 3), based on  $10^9$  replicates.

Score test for  $\tau_g$  without SPA,  $m = 100,000$

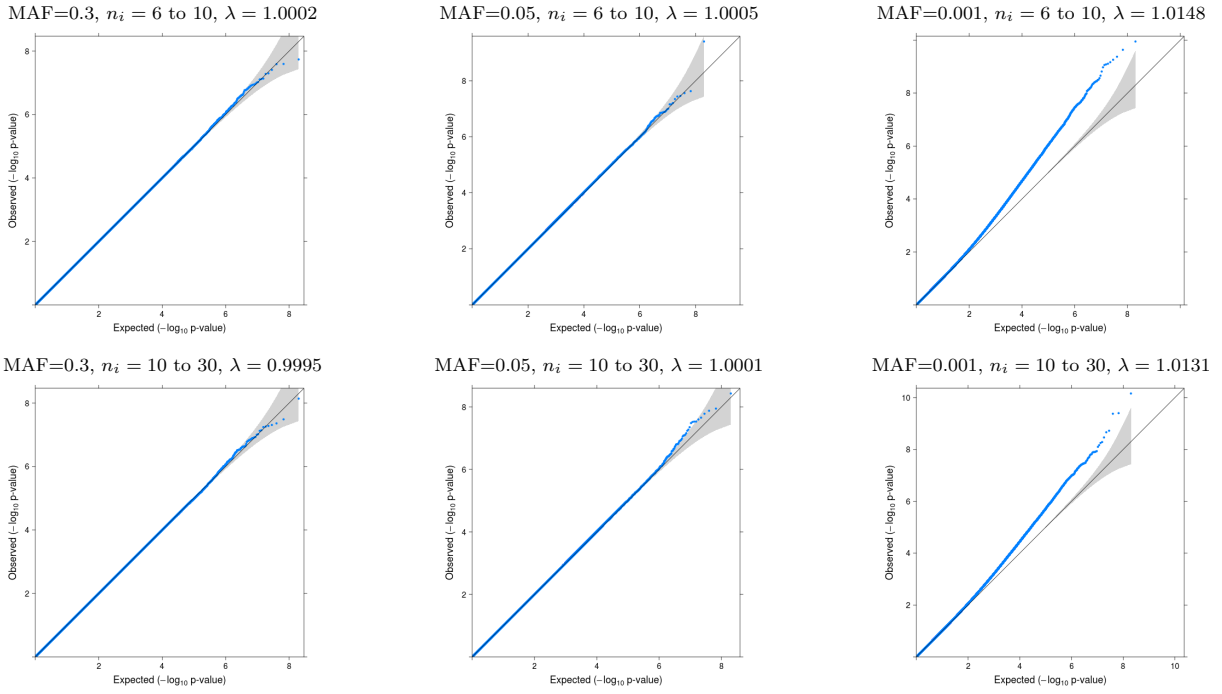

Score test for  $\tau_g$  with SPA,  $m = 100,000$

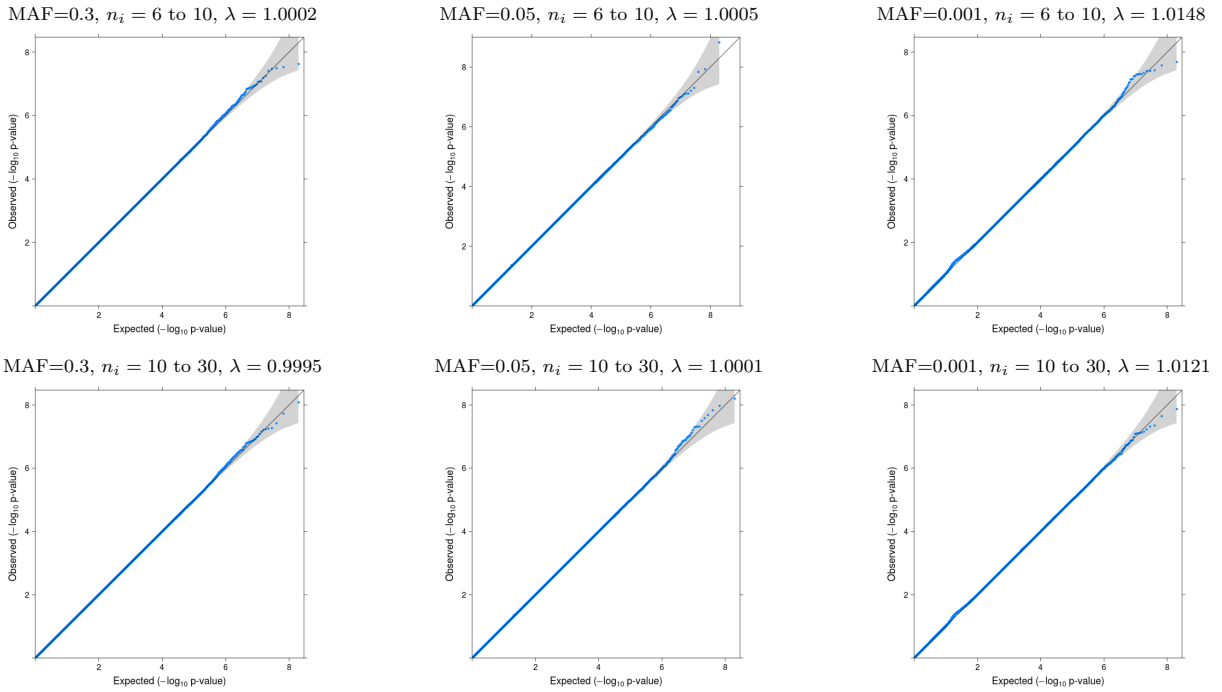

Figure S5: **Quantile-Quantile (QQ) plots of p values for testing  $\tau_g$  from the score test and SPA of the simulation studies,  $m = 10,000$**

QQ plots of p values from score test (row 1-2) and SPA (row 3-4) for testing  $\tau_g$ , where  $m = 10,000$ ,  $n_i = 6$  to 10 (row 1 and row 3) and  $n_i = 10$  to 30 (row 2 and row 4), MAF = 0.3 (column 1), 0.05 (column 2), and 0.001 (column 3), based on  $10^9$  replicates.

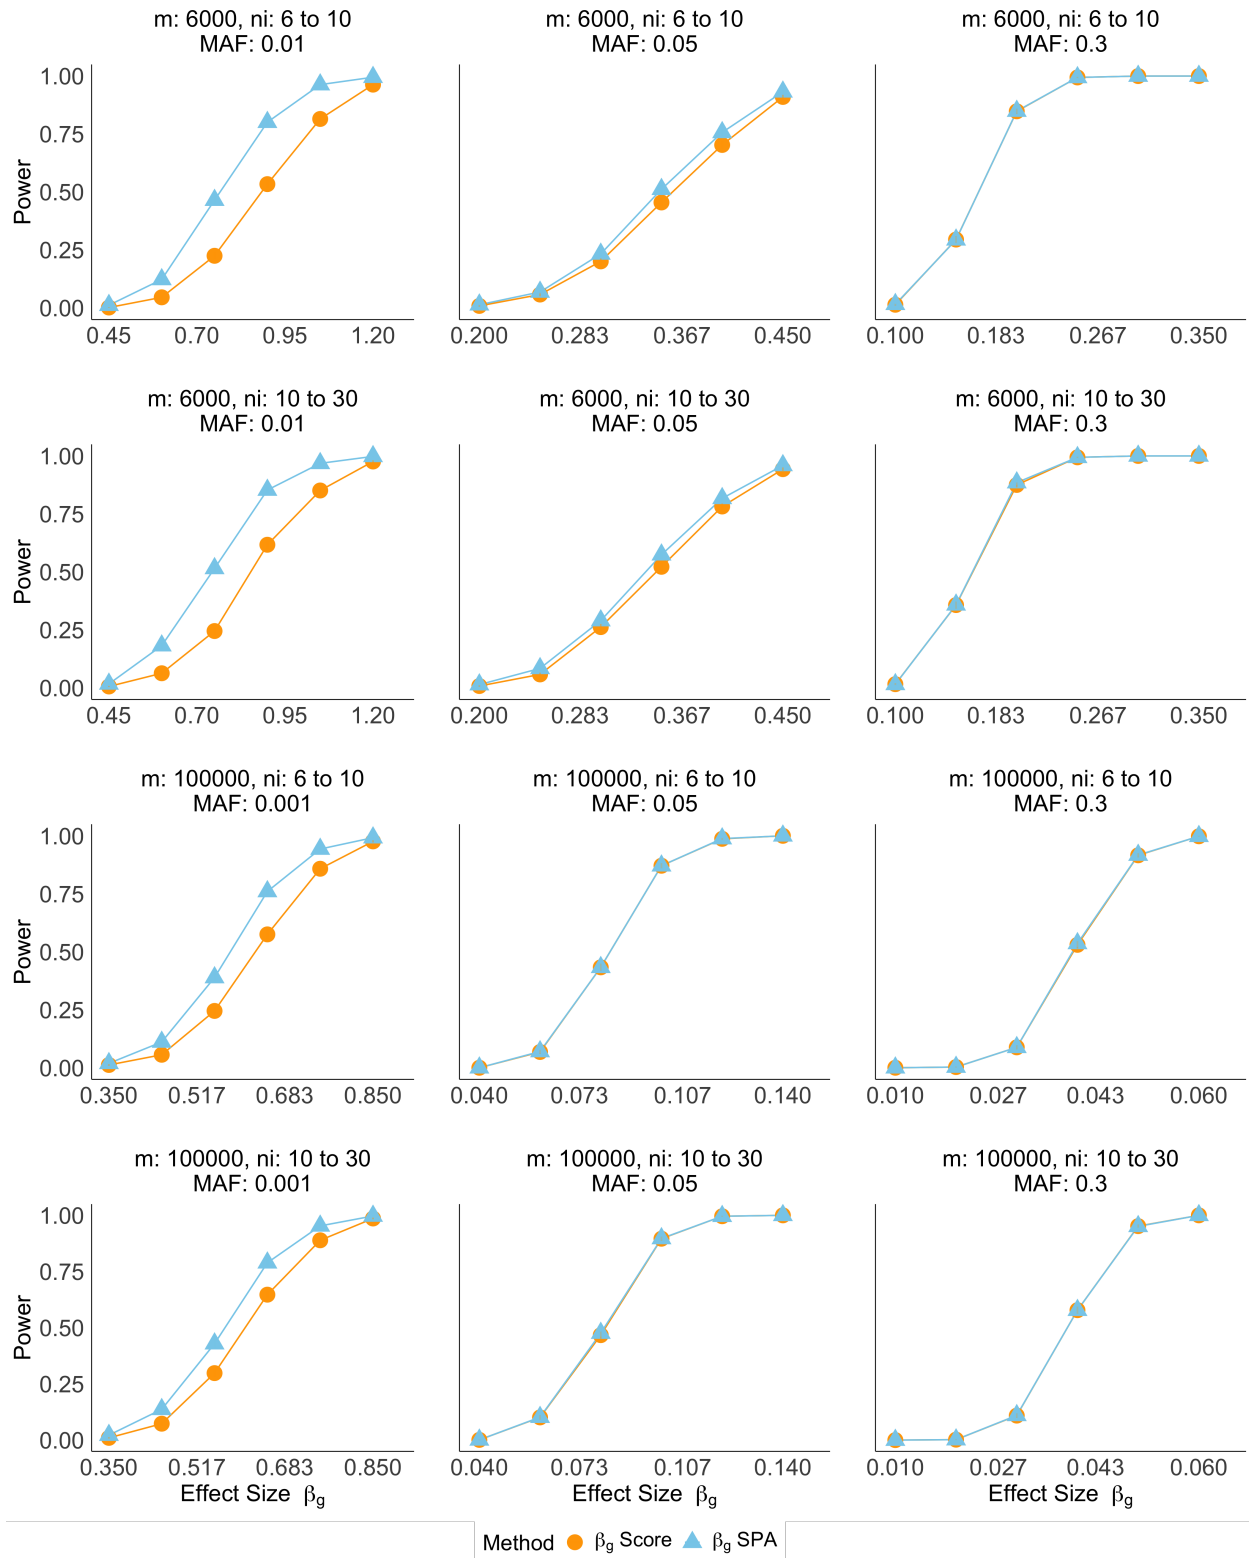

Figure S6: **Empirical powers of testing  $\beta_g$  with score test and SPA**

Each row contains the same sample size  $m$  and number of observations per individual  $n_i$ . Power is evaluated at the significance level  $\alpha = 5 \times 10^{-8}$ . Each scenario is based on 1,000 replicates.



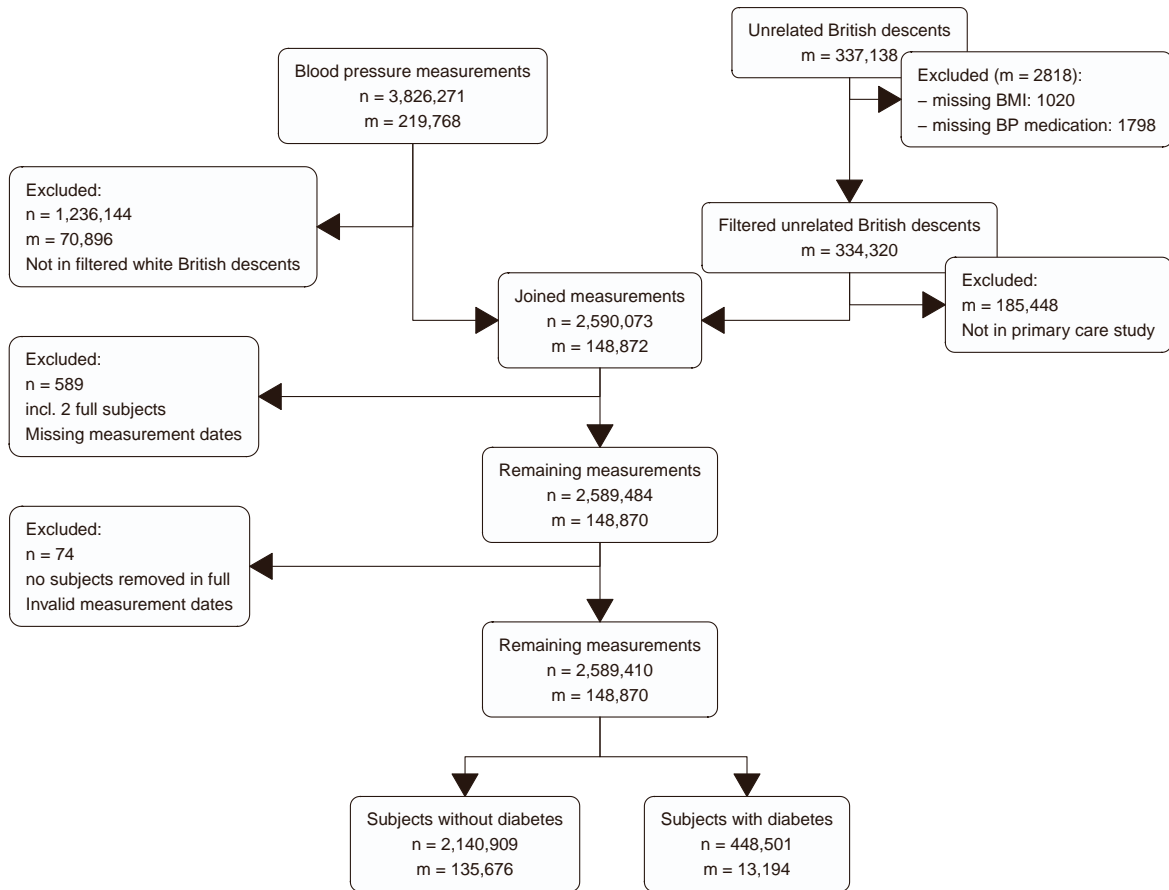

Figure S7: Cohort curation for blood pressure TrajGWAS analysis from UK Biobank primary care data.

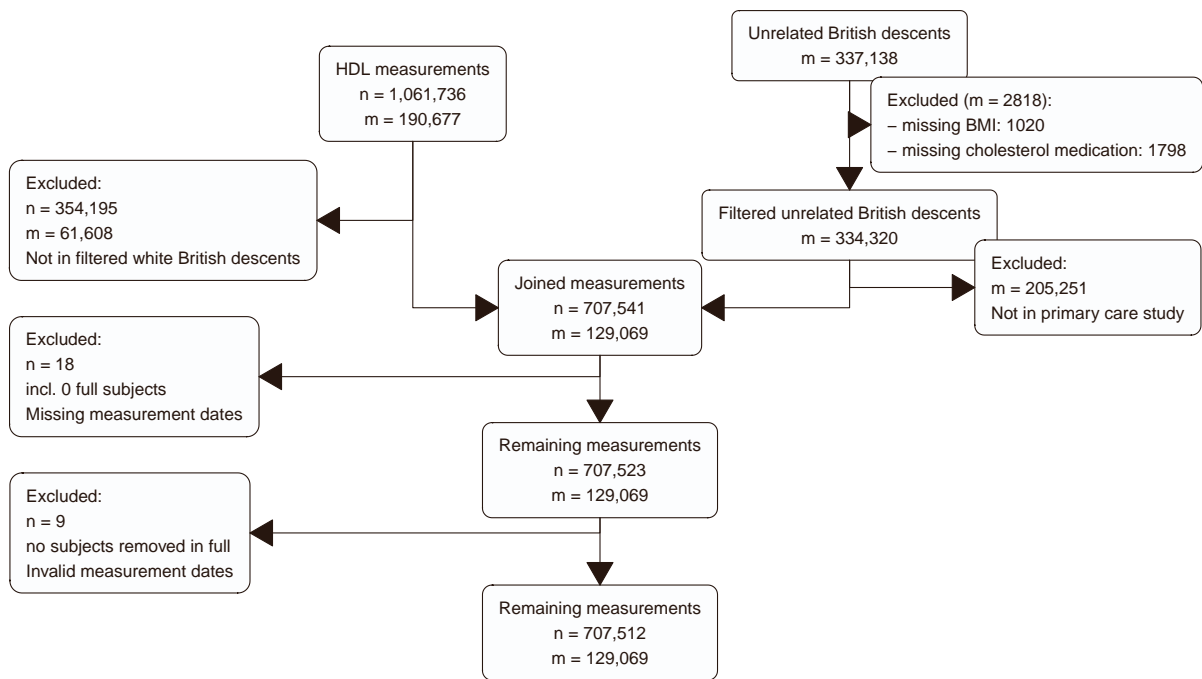

Figure S8: Cohort curation for HDL TrajGWAS analysis from UK Biobank primary care data.

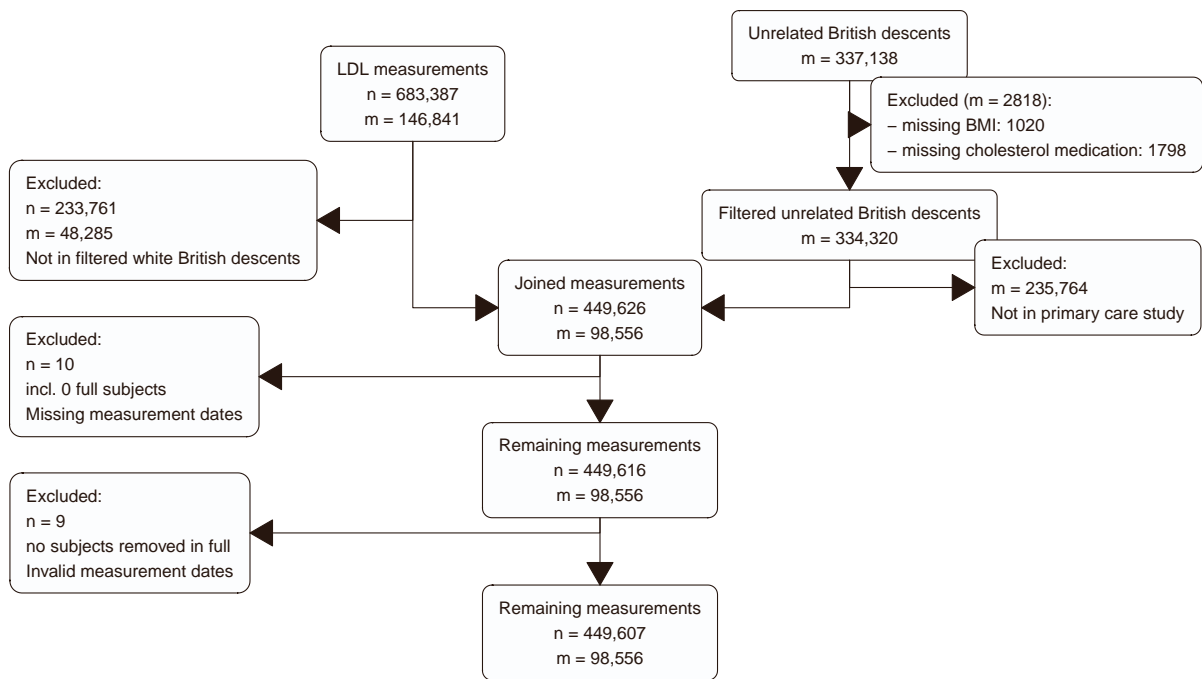

Figure S9: Cohort curation for LDL TrajGWAS analysis from UK Biobank primary care data.

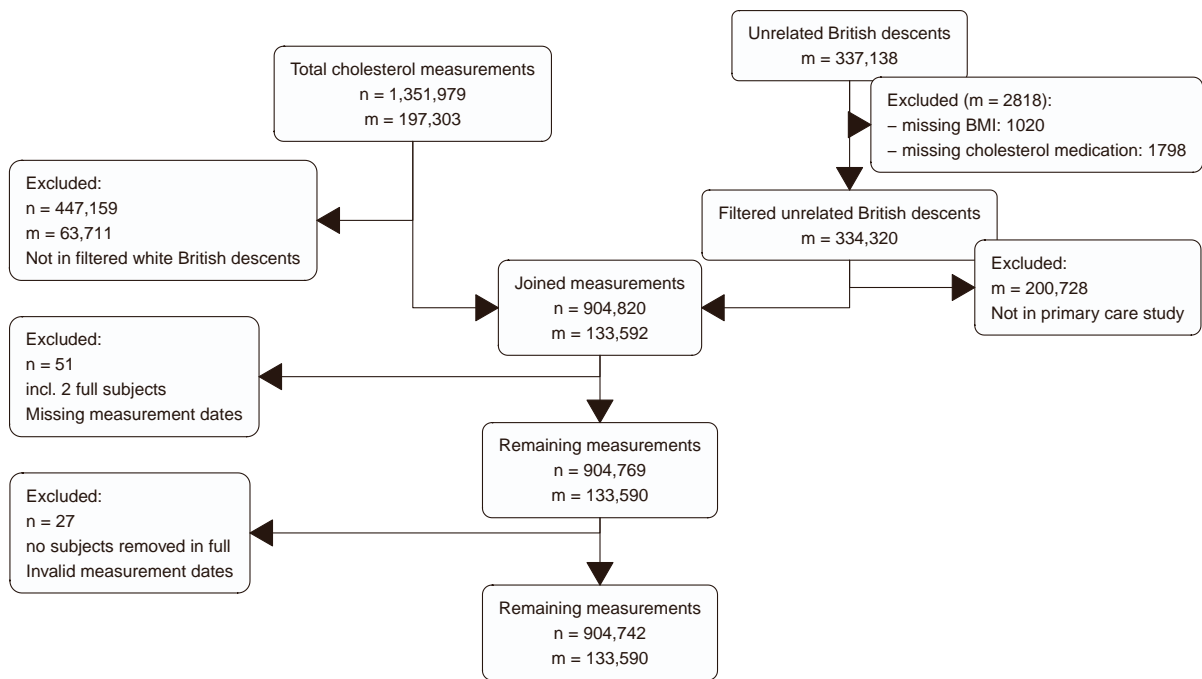

Figure S10: Cohort curation for total cholesterol TrajGWAS analysis from UK Biobank primary care data.

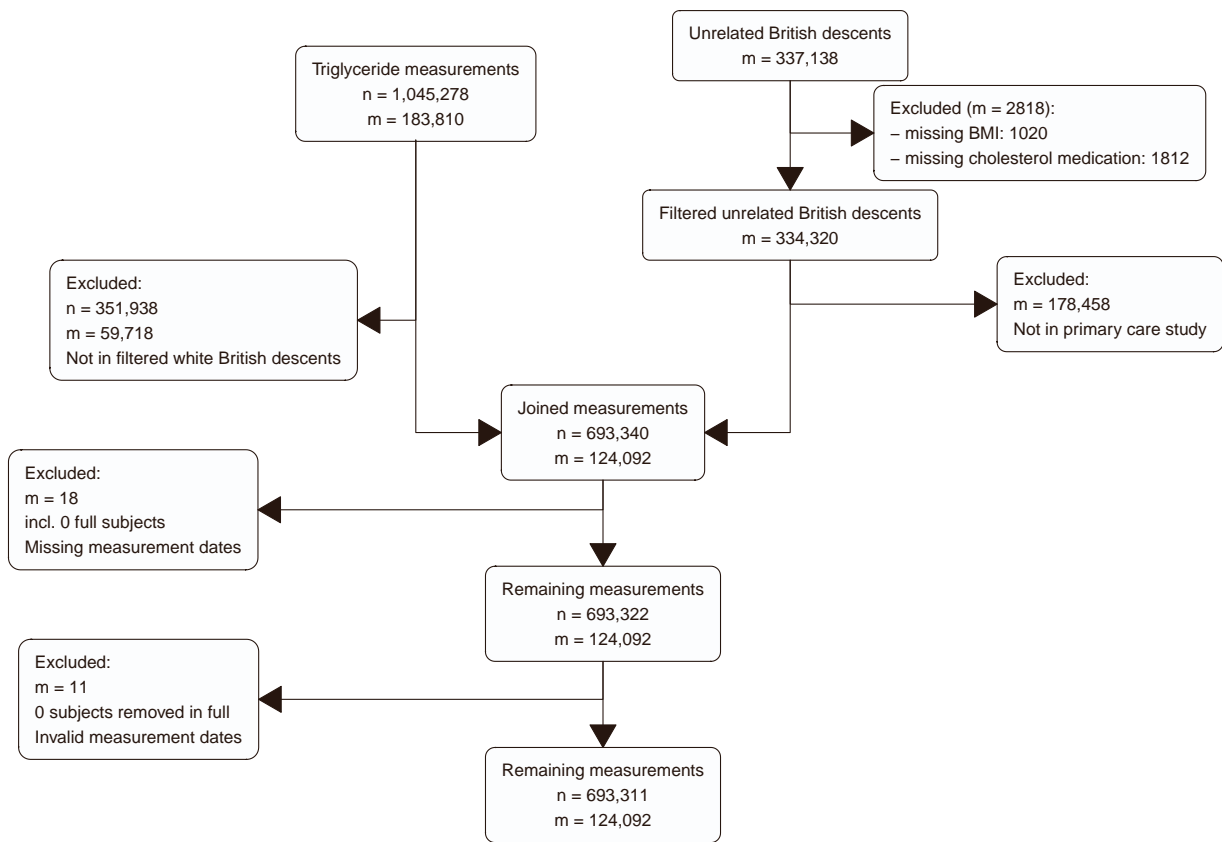

Figure S11: Cohort curation for triglycerides TrajGWAS analysis from UK Biobank primary care data.

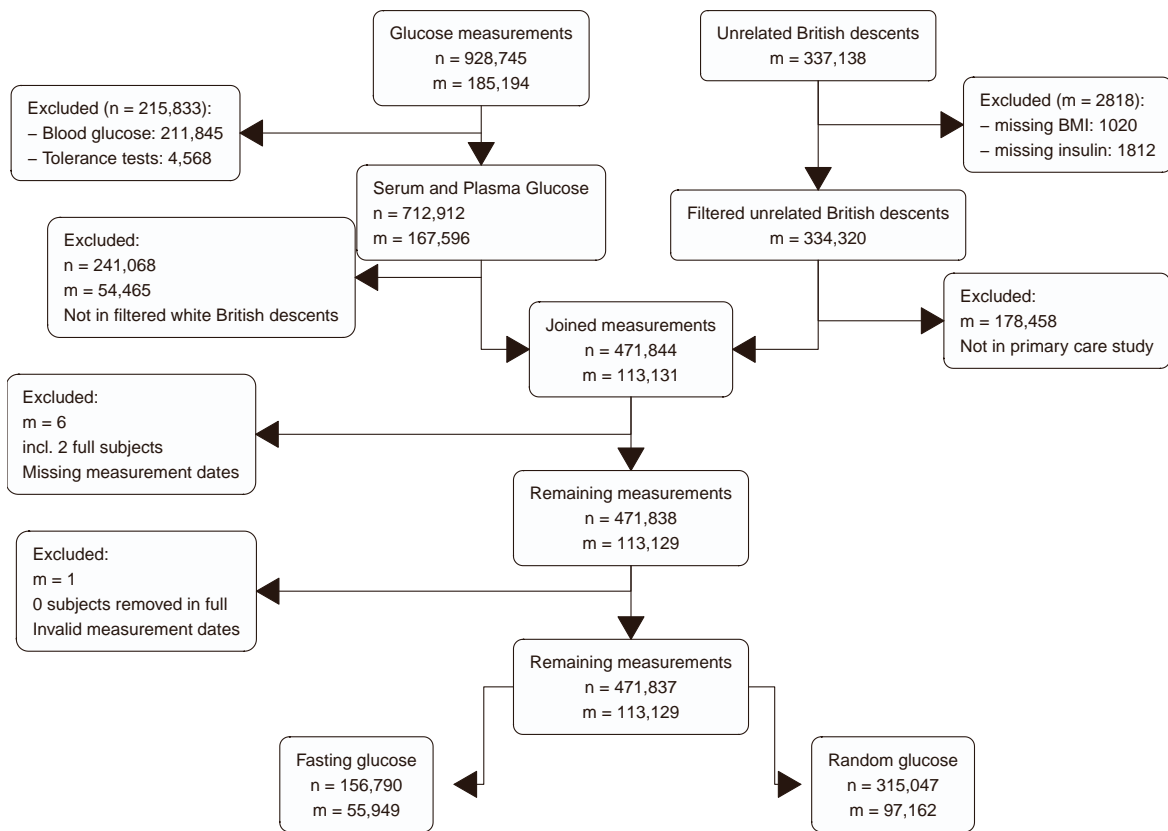

Figure S12: Cohort curation for glucose TrajGWAS analysis from UK Biobank primary care data.

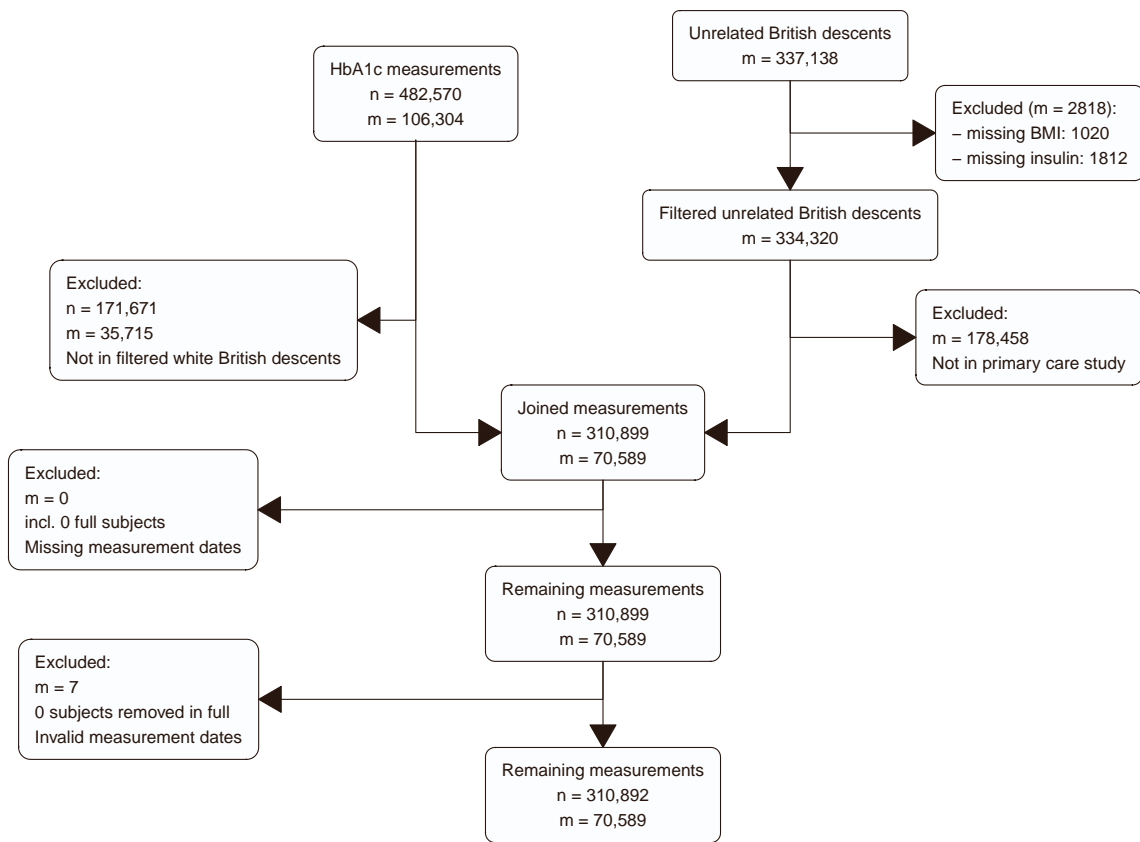

Figure S13: Cohort curation for HbA1c TrajGWAS analysis from UK Biobank primary care data.

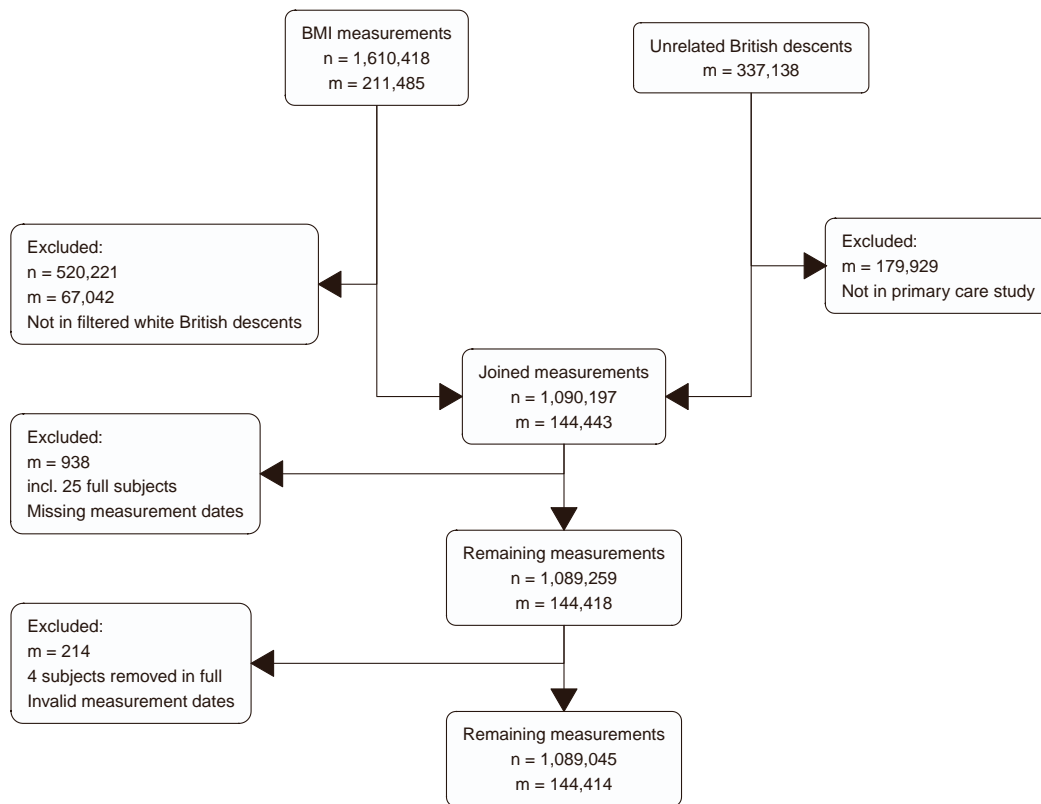

Figure S14: Cohort curation for BMI TrajGWAS analysis from UK Biobank primary care data.



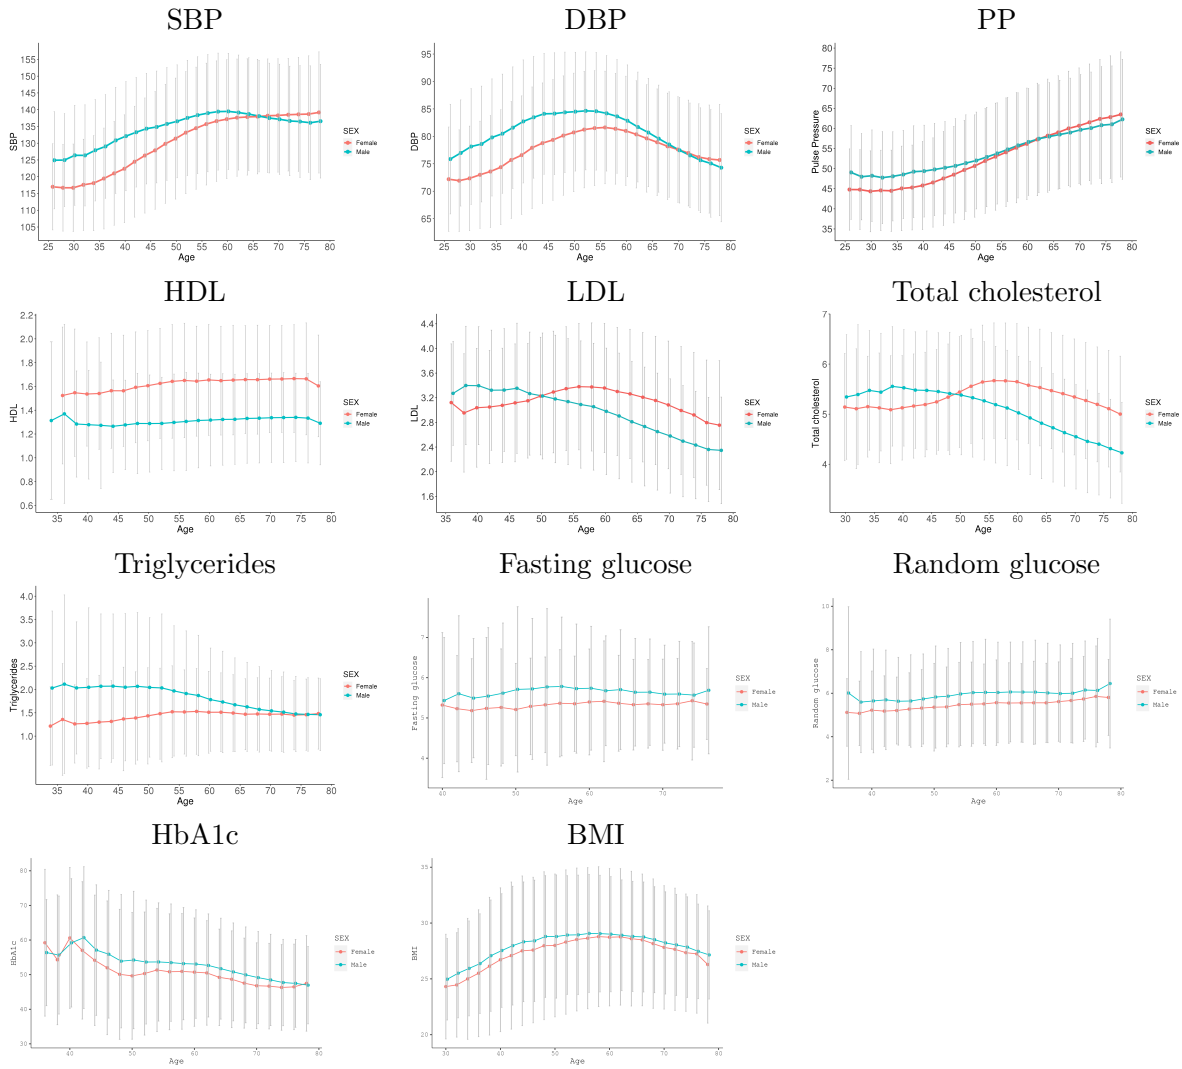

Figure S15: Mean profile plot over age groups for biomarker measures extracted from the UK Biobank primary care data.

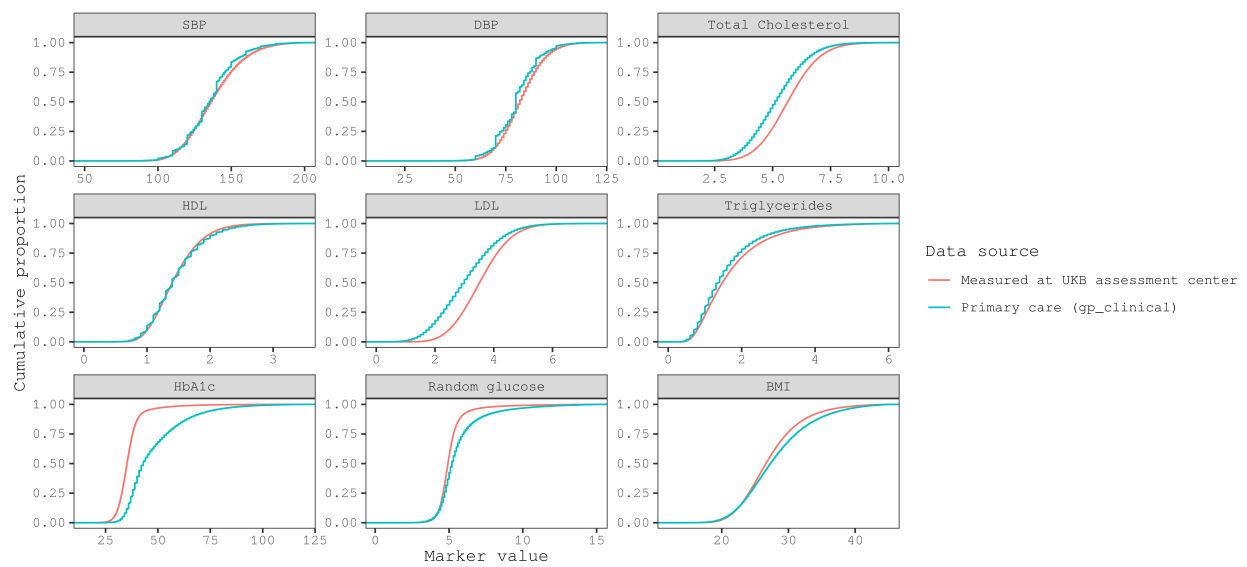

Figure S16: **Empirical cumulative distribution functions (eCDFs) of biomarker measures from UK Biobank primary care data (blue curve) and assessment centers (red curve) respectively.**

Agreement between the eCDFs provides quality control for the extraction procedure from the primary care data.

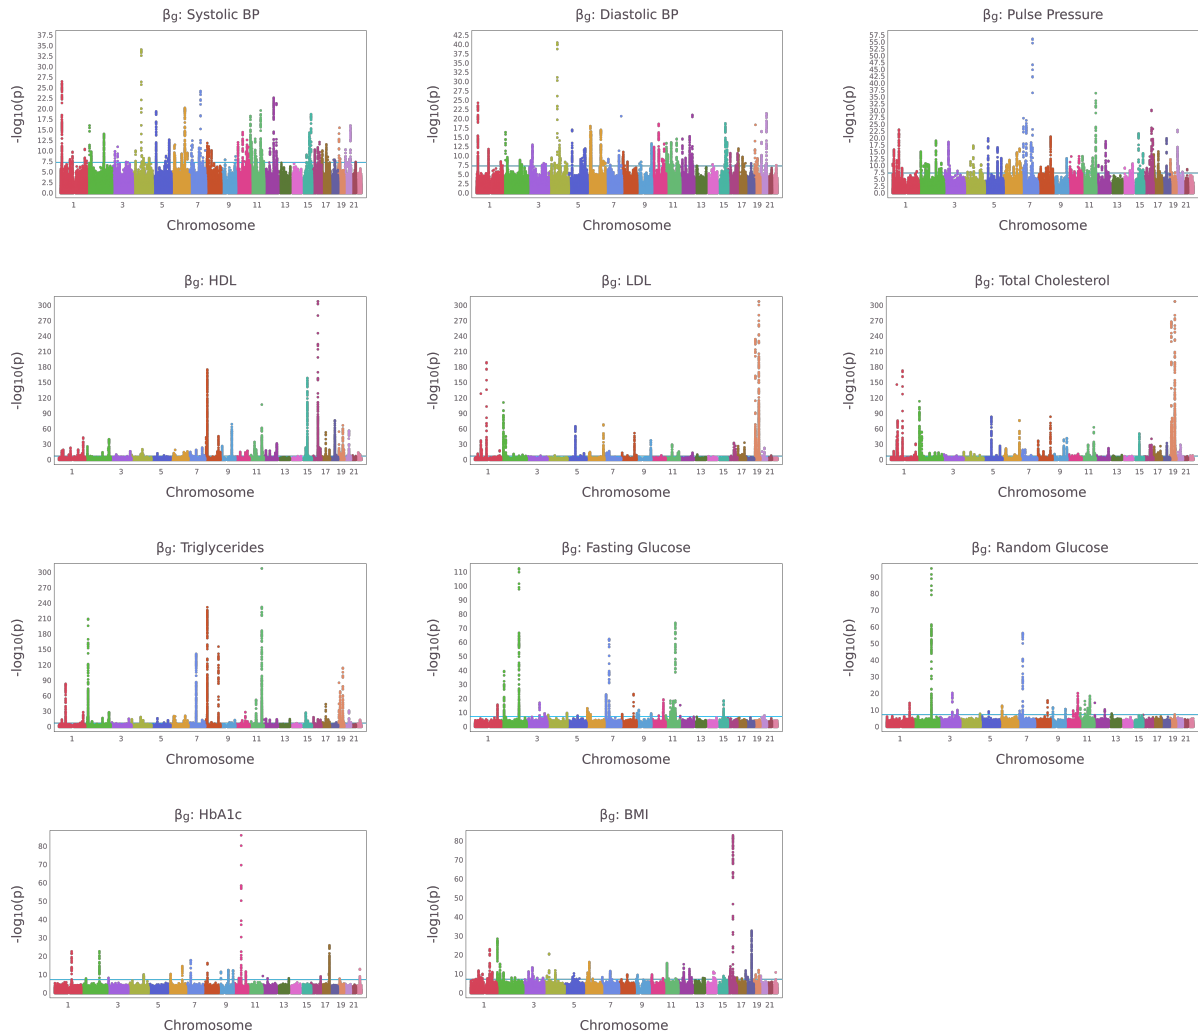

Figure S17: **Manhattan plots for testing  $\beta_g$  for longitudinal markers in the UK Biobank study**

Manhattan plots for testing  $\beta_g$ , effects to the mean, for 11 longitudinal biomarkers in the UK Biobank study. The blue line represents the genome-wide significance level,  $5 \times 10^{-8}$ .

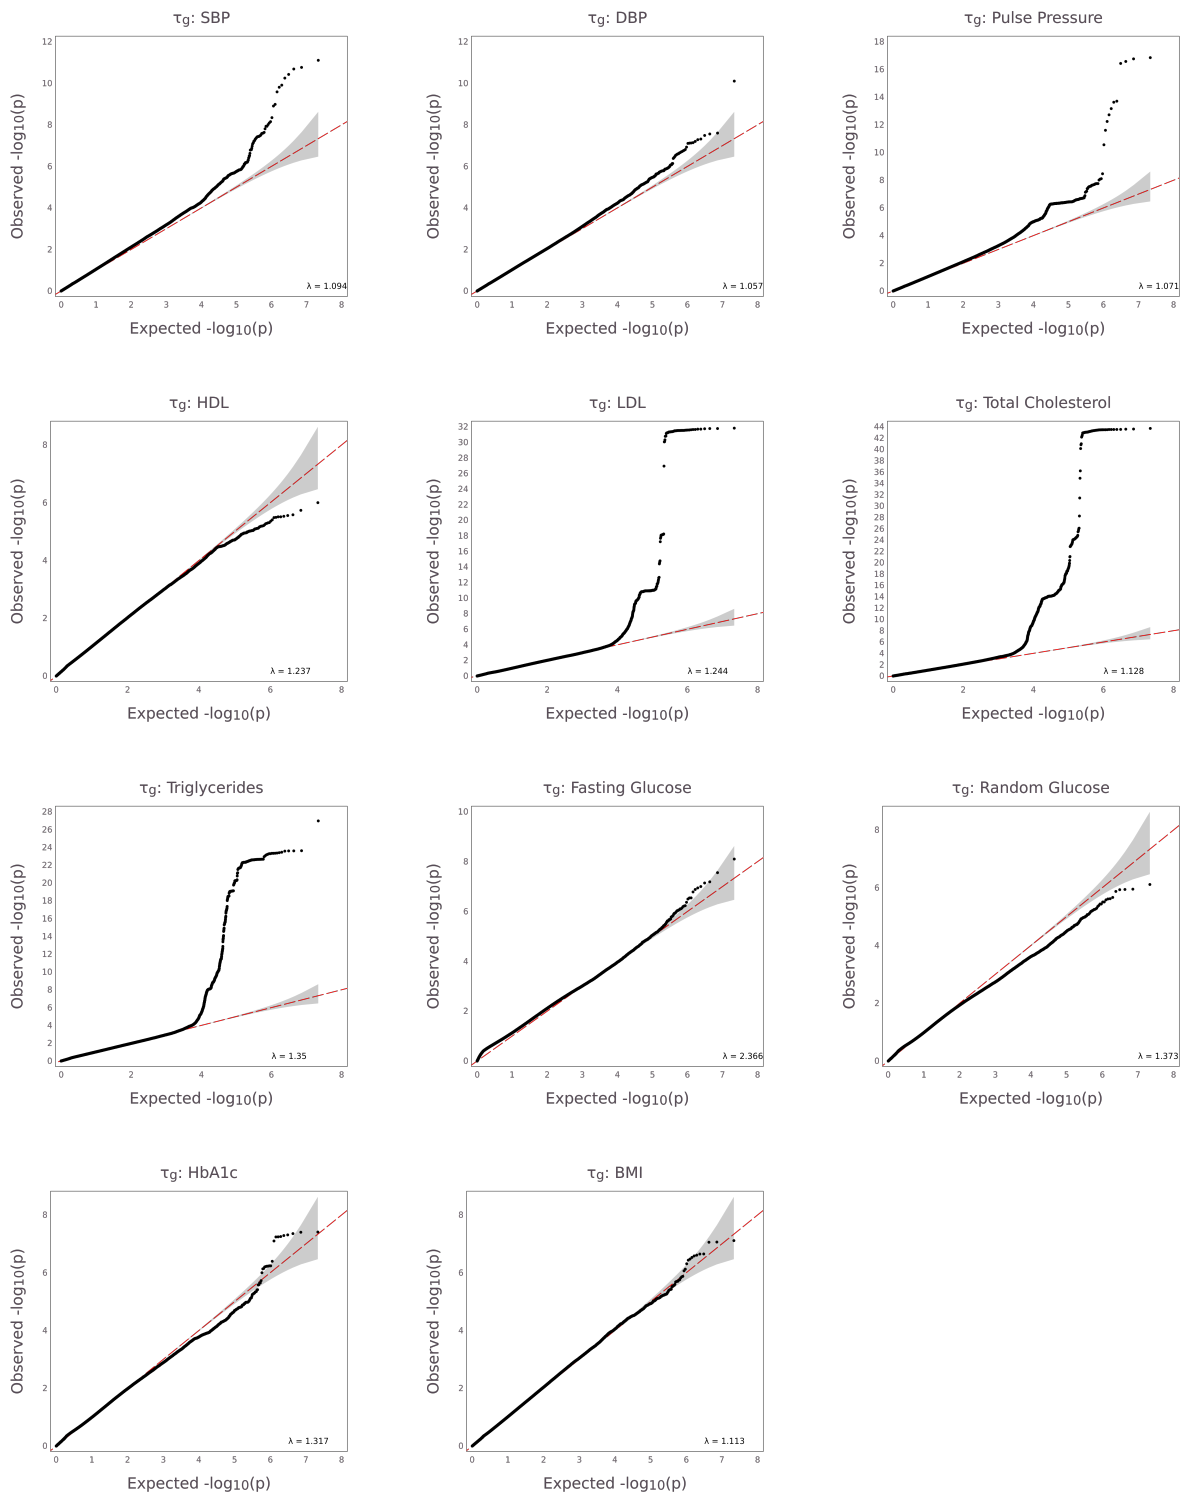

Figure S18: TrajGWAS QQ plots for testing  $\tau_g$ , effects on the WS variability, on 11 longitudinal biomarkers in the UK Biobank study

Genomic control factor,  $\lambda$ , is based on the median p value, where SPA is not applied. See Supplementary Table S3 for the  $\lambda$  values at different p value quantiles.

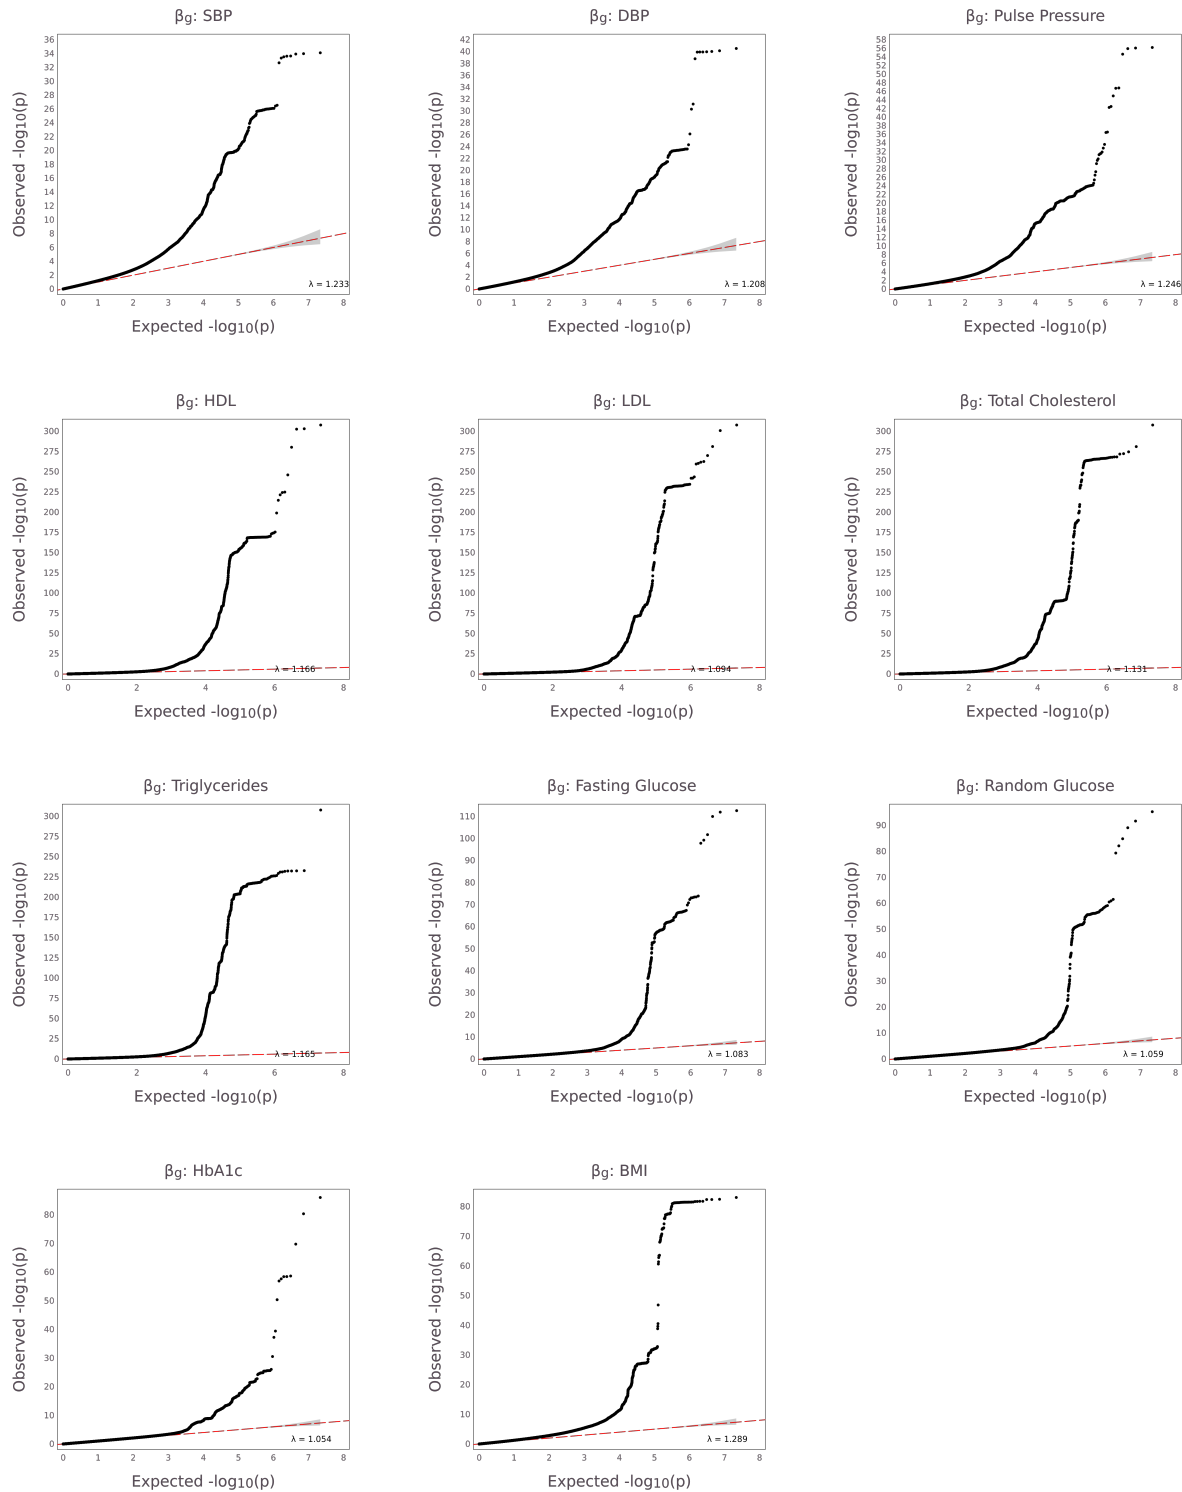

Figure S19: TrajGWAS QQ plots for  $\beta_g$ , effects to the mean, on 11 longitudinal biomarkers in the UK Biobank study

Genomic control factor,  $\lambda$ , is based off the median p value, where the score test is often applied. See Supplementary Table S3 for different p value quantile cutoffs.

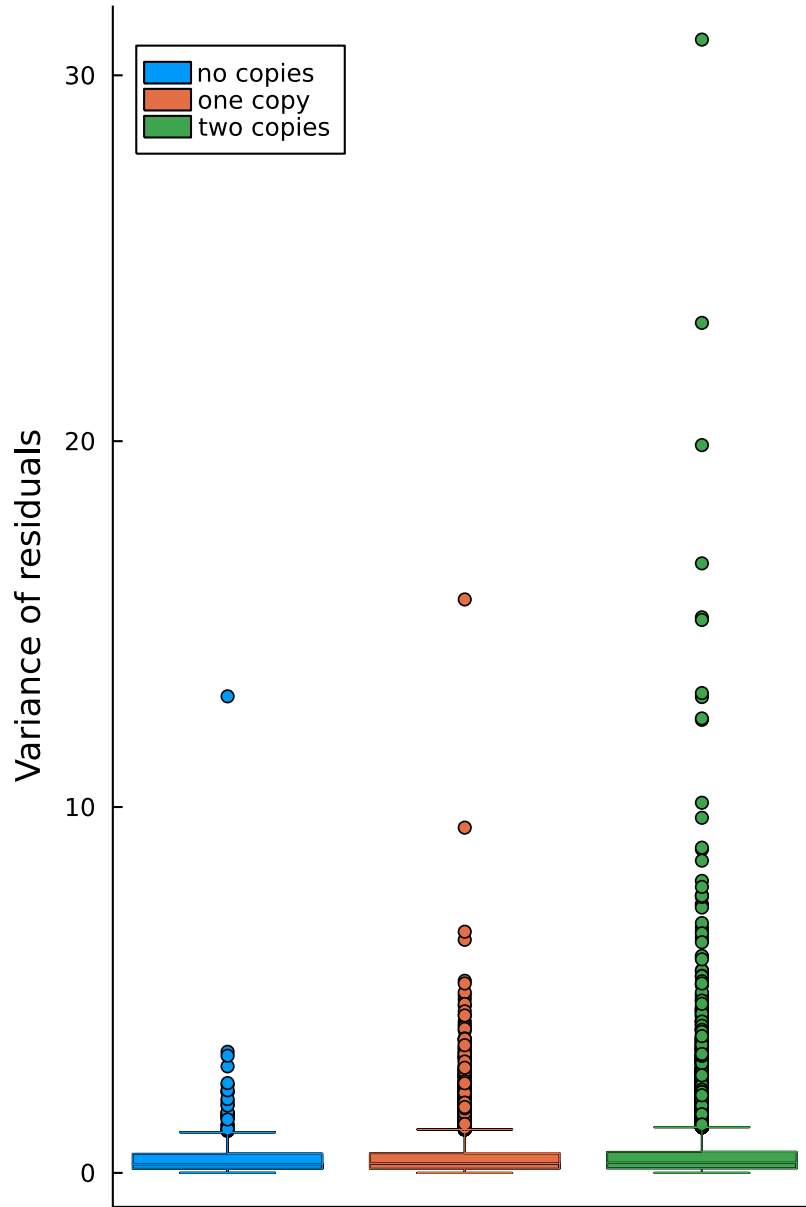

Figure S20: **Boxplots of within-sample variance of residuals of a SNP significant in terms of  $\tau_g$**

Boxplots of within-sample variance of residuals (regressed out mean part covariates other than the SNP count) of total cholesterol for different reference allele counts (0, 1, or 2) of rs6993414, the SNP with the lowest p value in terms of  $\tau_g$  on the *LPL* gene. Note that the phenotype is standardized before the analysis.

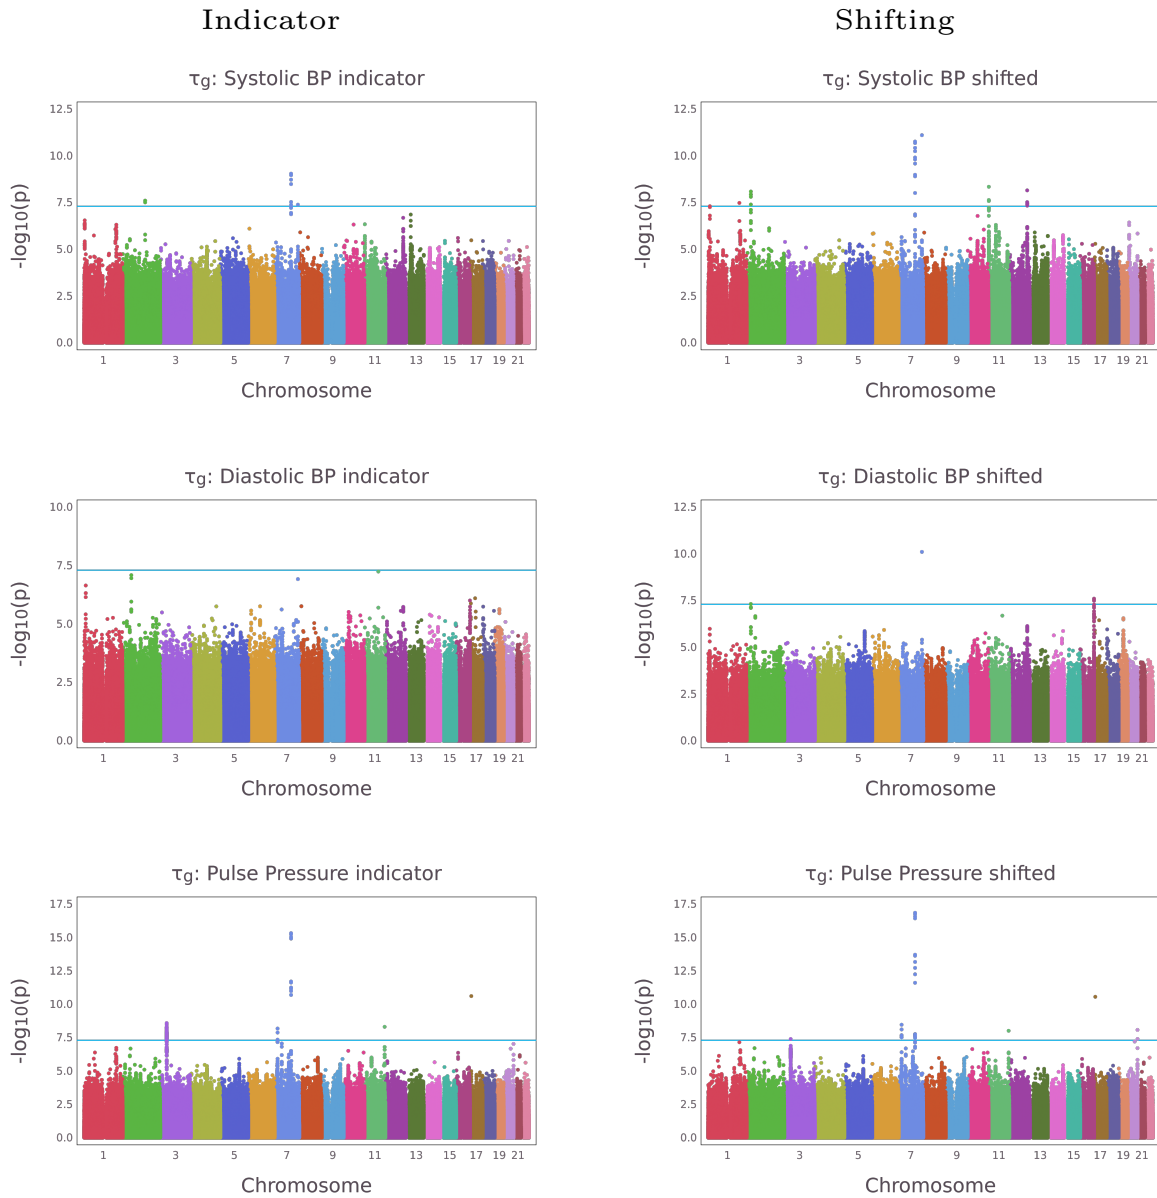

Figure S21: **Comparison of the medication adjustment methods in the blood pressure TrajGWAS analysis.**

We plot Manhattan plots for  $\tau_g$  in the blood pressure TrajGWAS analysis, effects to the WS variability for SBP, DBP, and PP in UK Biobank study. (Left) Medication adjusted by an additional indicator covariate reflecting on or off medication in both  $\beta_g$  and  $\tau_g$ . (Right) A sensible constant is added to the observed measures.

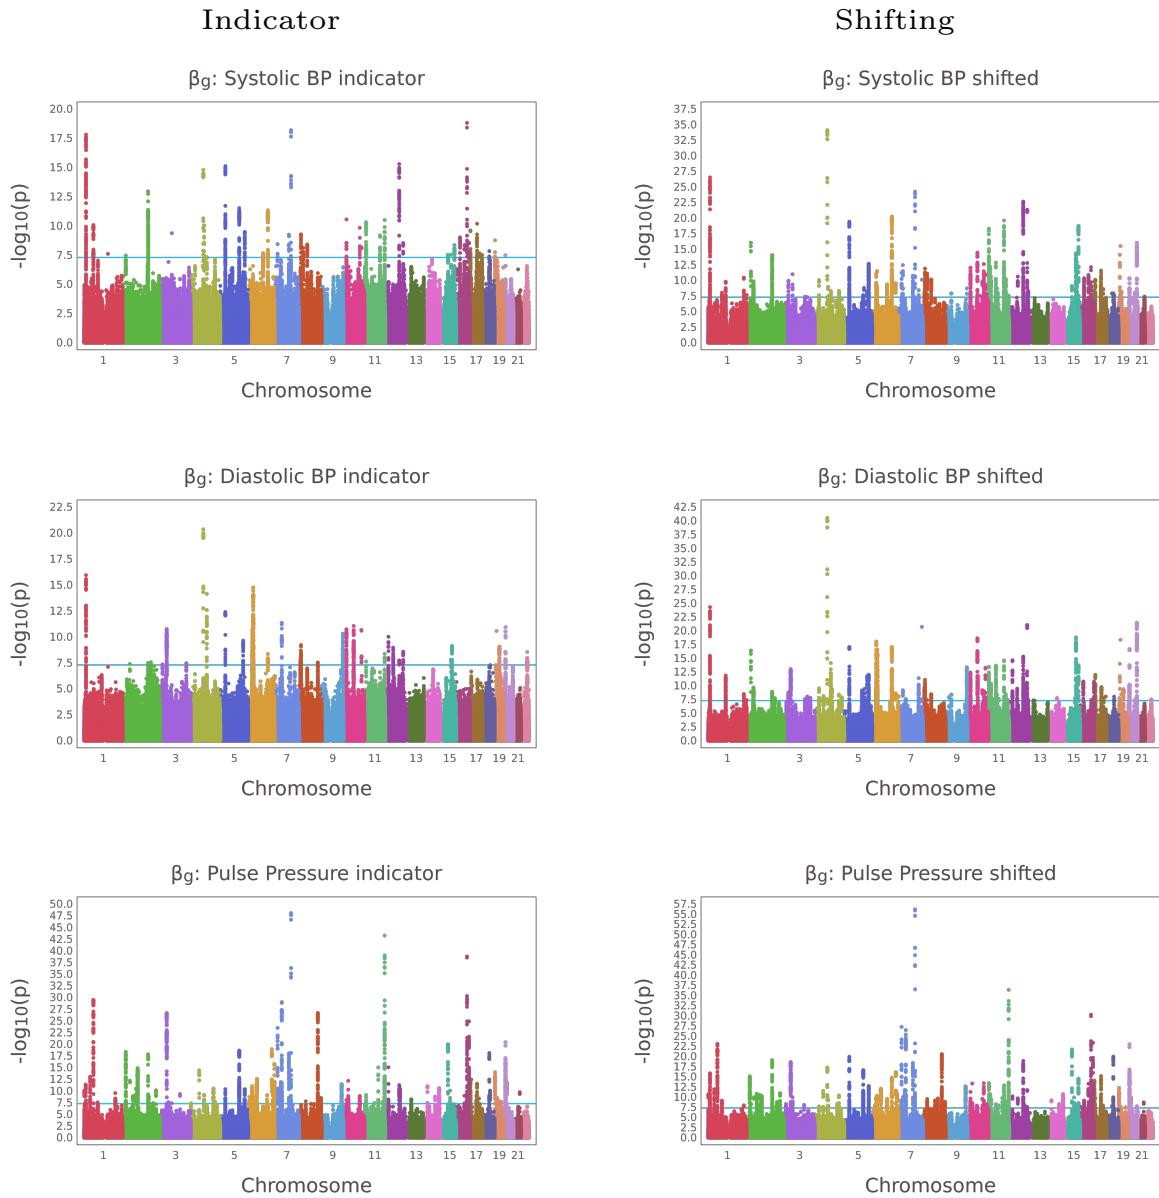

Figure S22: **Comparisons of medication adjustment methods in the blood pressures TrajGWAS analysis.**

We plot Manhattan plots for  $\beta_g$  in the TrajGWAS, effects to the mean for SBP, DBP, and PP, in UK Biobank study. (Left) Medication is adjusted by an additional indicator covariate to reflect on medication or not in both  $\beta_g$  and  $\tau_g$ . (Right) A sensible constant is added to the observed measures.





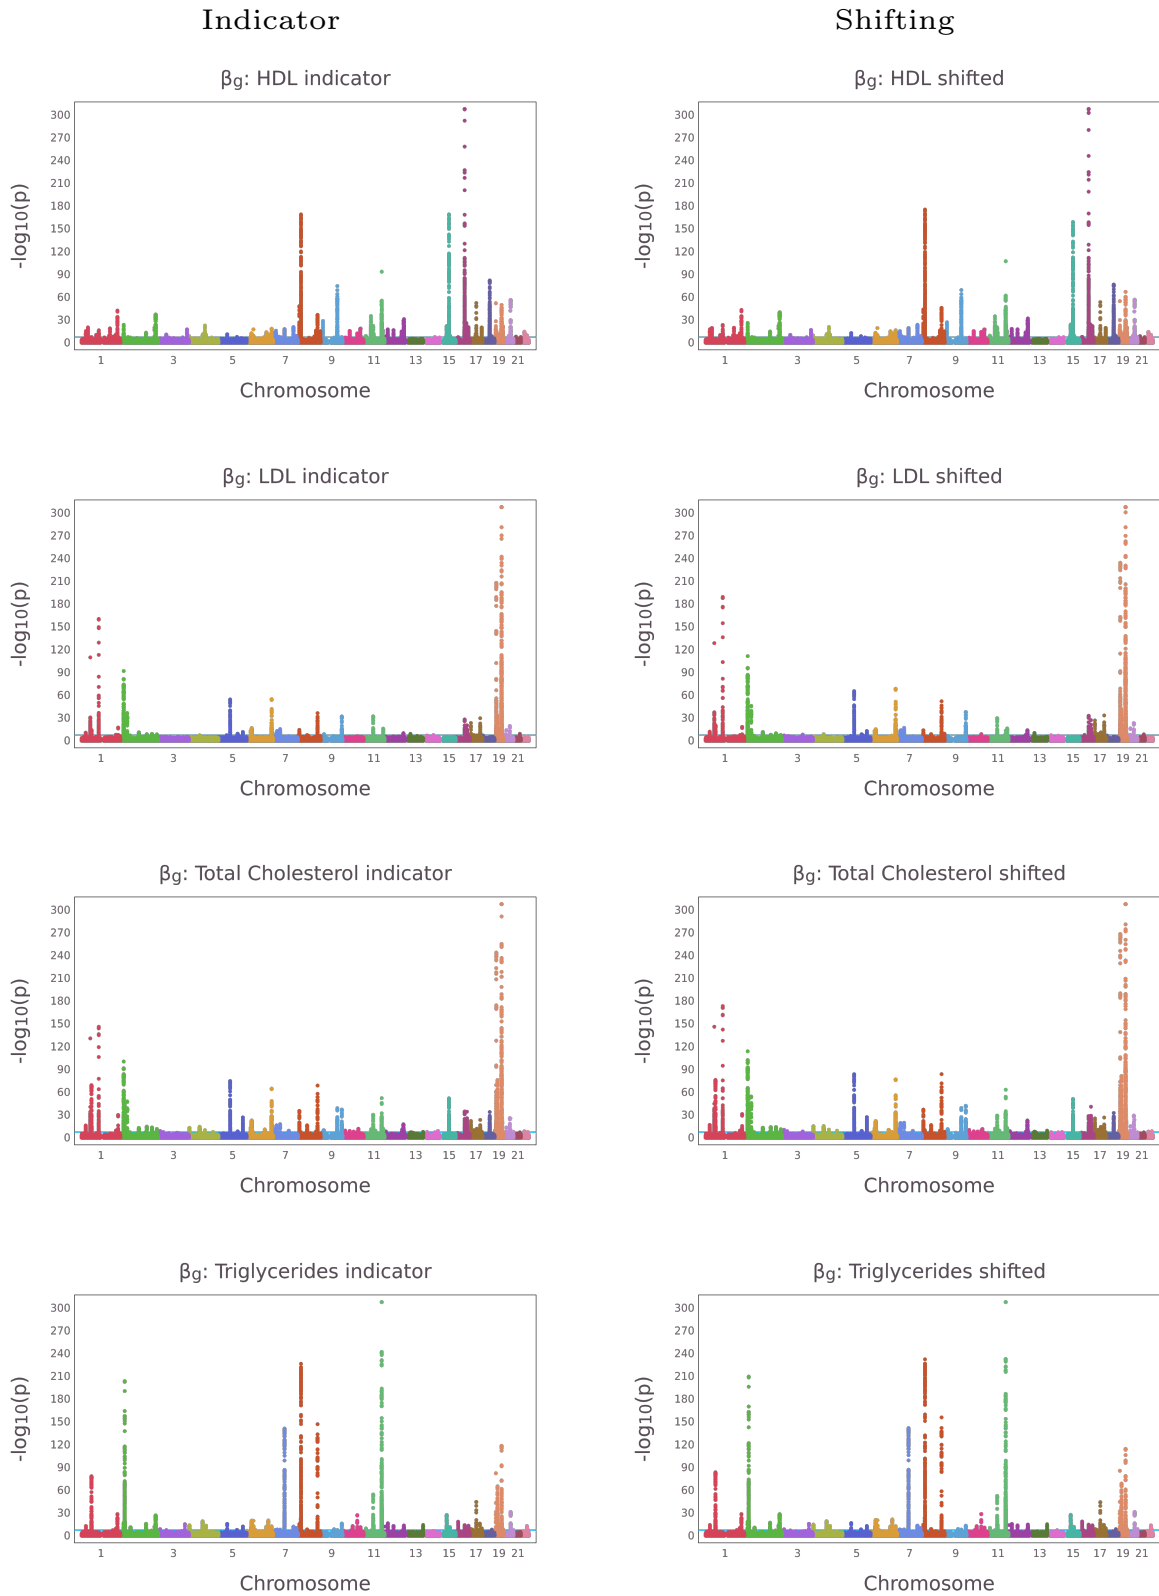

Figure S24: **Comparisons of the effects of medication adjustment in the lipid TrajGWAS analysis.**

We plot Manhattan plots for  $\beta_g$  in the TrajGWAS analysis, effects to the mean for HDL, LDL, total cholesterol, and triglyceride in UK Biobank study. (Left) Medication adjusted by an additional indicator covariate reflecting on or off medication in both  $\beta_g$  and  $\tau_g$ . (Right) A sensible constant is added to the observed measures.

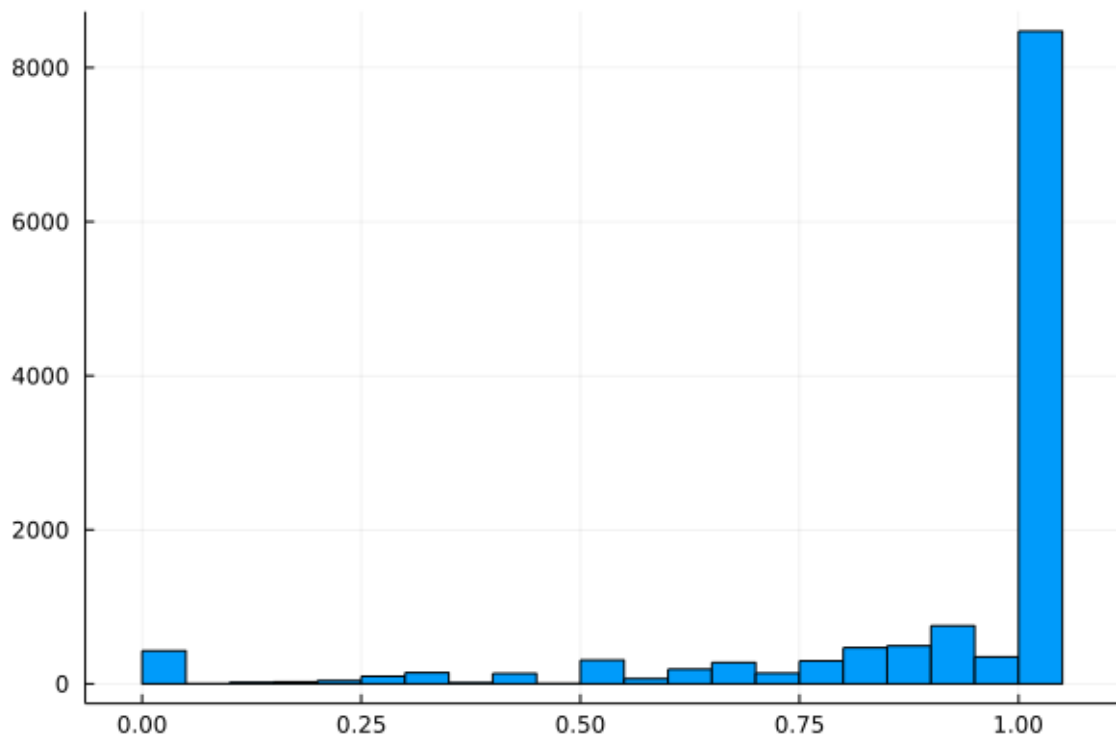

Figure S25: Histogram of the proportion of observation after the diagnosis of diabetes

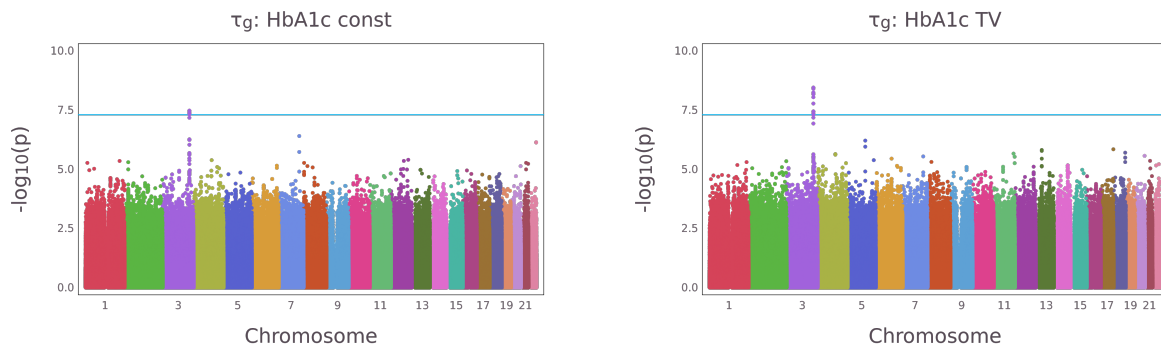

Figure S26: **Manhattan plots for testing  $\tau_g$  for HbA1c with different adjustments for disease status**

Manhattan plots for testing  $\tau_g$ , the effects of the WS variability, for HbA1c. Adjustment for diabetes status is performed on both mean and WS variation component: (left) adjustment using a constant indicator, (right) adjustment using a time-varying indicator. The blue line represents the genome-wide significance level,  $5 \times 10^{-8}$ .

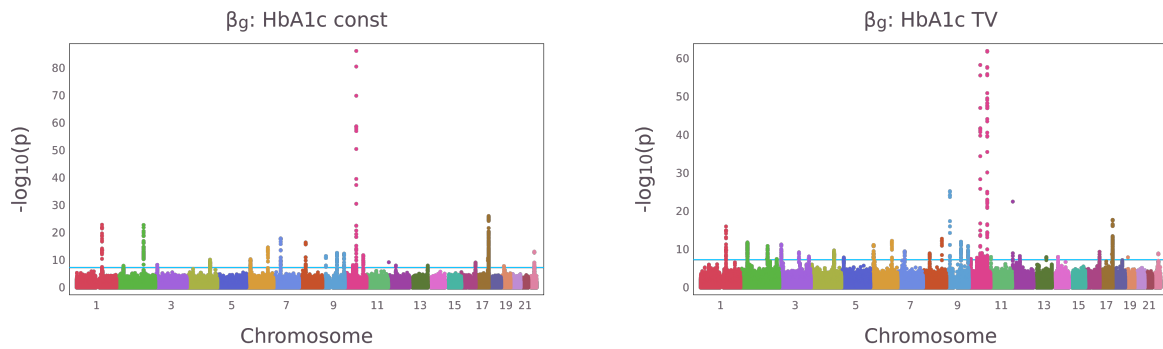

Figure S27: **Manhattan plots for testing  $\beta_g$  for HbA1c with different adjustments for disease status**

Manhattan plots for testing  $\beta_g$ , the effects of the WS variability, for HbA1c. Adjustment for diabetes status is performed on both mean and WS variation component: (left) adjustment using a constant indicator, (right) adjustment using a time-varying indicator. The blue line represents the genome-wide significance level,  $5 \times 10^{-8}$ .

Table S1: **Variables in the UK Biobank primary care clinical event records table (clinical\_table) by source and the unified UK Biobank variable names.**

| Column name   | Description                                                      |
|---------------|------------------------------------------------------------------|
| eid           | Participant identifier                                           |
| data_provider | 1 = England (Vision), 2 = Scotland, 3 = England (TPP), 4 = Wales |
| event_dt      | Date clinical code was entered                                   |
| read_2        | Read v2                                                          |
| read_3        | CTV3 (Read v3)                                                   |
| value1        | Value recorded 1                                                 |
| value2        | Value recorded 2                                                 |
| value3        | Value recorded 3                                                 |

Table S2: Clinical terms used to extract biomarkers from UK Biobank primary care data and the UK Biobank field numbers being compared to in Figure S16.

| Biomarker                | Units             | Terminology  | Terms                                                                 | UK Biobank field |
|--------------------------|-------------------|--------------|-----------------------------------------------------------------------|------------------|
| Systolic Blood Pressure  | mmHg              | Read v2/CTV3 | 246., 246[012345679BCDEFGJNQSWEYdg], G20., XaF4[FLO], XaJ2[EG], XaKFx | 93               |
| Diastolic Blood Pressure | mmHg              | Read v2/CTV3 | 246., 246[012345679BCDEFGJNQSWEYcg], G20., XaF4[Sab], XaJ2[FH], XaKFw | 94               |
| Total Cholesterol        | mmol/L            | Read v2/CTV3 | 44P., 44P[12349HJKZ], XE2eD, XaJe9, XSK14, XaLux, XaFs9, XaIRd        | 30690            |
| HDL                      | mmol/L            | Read v2/CTV3 | XaEVr, X772M, 44d[23], 44P[5BC]                                       | 30760            |
| LDL                      | mmol/L            | Read v2/CTV3 | XaEVs, 44d[45], 44P[6DE]                                              | 30780            |
| Triglycerides            | mmol/L            | Read v2/CTV3 | 44e, X772O, 44Q[.12345Z], XE2q9                                       | 30870            |
| Random Glucose           | mmol/L            | Read v2/CTV3 | 44f., 44f0., 44g., 44g0., 44TA., XM0ly                                | 30740            |
| Fasting Glucose          | mmol/L            | Read v2/CTV3 | 44f1, 44g1                                                            |                  |
| HbA1c                    | mmol/mol          | Read v2/CTV3 | XaPbt, XaERp, X772q, 42W., 42W[12345Z], 44TB.                         | 30750            |
| Height                   | m                 | Read v2/CTV3 | 229., 229[1234Z]                                                      | 50               |
| Weight                   | kg                | Read v2/CTV3 | 1622., 22A., 22A[1234567AZ], X76CG, XE1h4, XM01G, Xa7wI               | 21002            |
| BMI                      | kg/m <sup>2</sup> | Read v2/CTV3 | 22K., 22K[12345678], XaCDR, XaJJH, XaJqk, XaZcl                       | 21001            |

“[.]” represents any one letter or number among the content provided in “[.]” can be used.

Table S3: **Genomic control factor  $\lambda$  at various p value quantiles for the UK Biobank analyses.**

Because SPA is only applied to score test statistics in the right tail, the genomic control factor calculated based on the median p values, which is not SPA adjusted, may appear inflated.

| Phenotype                | Parameter | Genomic control factor at $q^{th}$ p value quantile |            |            |
|--------------------------|-----------|-----------------------------------------------------|------------|------------|
|                          |           | $q = 0.5$ (median)                                  | $q = 0.05$ | $q = 0.01$ |
| Systolic blood pressure  | $\beta_g$ | 1.23                                                | 1.32       | 1.48       |
|                          | $\tau_g$  | 1.09                                                | 1.07       | 1.07       |
| Diastolic blood pressure | $\beta_g$ | 1.21                                                | 1.29       | 1.48       |
|                          | $\tau_g$  | 1.06                                                | 1.04       | 1.03       |
| Pulse pressure           | $\beta_g$ | 1.25                                                | 1.34       | 1.50       |
|                          | $\tau_g$  | 1.07                                                | 1.06       | 1.07       |
| HDL                      | $\beta_g$ | 1.166                                               | 1.253      | 1.451      |
|                          | $\tau_g$  | 1.237                                               | 1.023      | 1.013      |
| LDL                      | $\beta_g$ | 1.094                                               | 1.12       | 1.193      |
|                          | $\tau_g$  | 1.244                                               | 1.011      | 1.007      |
| Total Cholesterol        | $\beta_g$ | 1.131                                               | 1.203      | 1.386      |
|                          | $\tau_g$  | 1.128                                               | 1.04       | 1.055      |
| Triglycerides            | $\beta_g$ | 1.165                                               | 1.229      | 1.419      |
|                          | $\tau_g$  | 1.35                                                | 1.01       | 0.985      |
| Random Glucose           | $\beta_g$ | 1.08                                                | 1.08       | 1.10       |
|                          | $\tau_g$  | 1.19                                                | 1.01       | 1.01       |
| Fasting Glucose          | $\beta_g$ | 1.08                                                | 1.09       | 1.12       |
|                          | $\tau_g$  | 2.37                                                | 1.12       | 1.07       |
| HbA1c                    | $\beta_g$ | 1.05                                                | 1.05       | 1.06       |
|                          | $\tau_g$  | 1.32                                                | 0.99       | 0.99       |
| BMI                      | $\beta_g$ | 1.29                                                | 1.39       | 1.53       |
|                          | $\tau_g$  | 1.11                                                | 1.02       | 1.02       |



Table S4: **Previously reported traits associated with novel SNPs of systolic blood pressure from NHGRI GWAS Catalog.**

| Gene | Chromosome | Number of SNPs ( $\beta_g / \tau_g$ ) | Trait(s)                                                                                                                                                                                                                                                                                                                                                                                                                                                                                                                                                                     |
|------|------------|---------------------------------------|------------------------------------------------------------------------------------------------------------------------------------------------------------------------------------------------------------------------------------------------------------------------------------------------------------------------------------------------------------------------------------------------------------------------------------------------------------------------------------------------------------------------------------------------------------------------------|
| BCL2 | 18         | 1 / 0                                 | Body mass index<br>High light scatter reticulocyte count<br>Modified Stumvoll Insulin Sensitivity Index (BMI interaction)<br>Modified Stumvoll Insulin Sensitivity Index (model adjusted for BMI)<br>Reticulocyte count<br>Systolic blood pressure<br>Triglyceride levels<br>Triglycerides<br>Type 2 diabetes<br>Waist-hip ratio<br>Waist-to-hip ratio adjusted for BMI<br>Waist-to-hip ratio adjusted for BMI (adjusted for smoking behaviour)<br>Waist-to-hip ratio adjusted for BMI x sex x age interaction (4df test)<br>Waist-to-hip ratio adjusted for body mass index |

Table S5: Previously reported traits associated with novel SNPs of diastolic blood pressure from NHGRI GWAS Catalog.

| Gene             | Chromosome | Number of SNPs ( $\beta_g / \tau_g$ ) | Trait(s)                                                                                                                                                          |
|------------------|------------|---------------------------------------|-------------------------------------------------------------------------------------------------------------------------------------------------------------------|
| CLOCK            | 4          | 3 / 0                                 | Height<br>Red blood cell count<br>Waist-to-hip ratio adjusted for BMI x sex interaction<br>Waist-to-hip ratio adjusted for BMI x sex x age interaction (4df test) |
| PDCL2            | 4          | 1 / 0                                 | Height                                                                                                                                                            |
| HAND2            | 4          | 1 / 0                                 | Atrial fibrillation                                                                                                                                               |
| HCG15            | 6          | 1 / 0                                 | Depression (broad)                                                                                                                                                |
| SAR1P1           | 6          | 1 / 0                                 | Blood protein levels                                                                                                                                              |
| XXbac-BPG308J9.3 | 6          | 4 / 0                                 | Breast cancer<br>Heel bone mineral density<br>Intelligence (MTAG)<br>Schizophrenia                                                                                |
| OR11A1           | 6          | 1 / 0                                 | Estimated glomerular filtration rate in diabetes                                                                                                                  |
| HLA-F            | 6          | 1 / 0                                 | Psoriatic arthritis                                                                                                                                               |
| HLA-F-AS1        | 6          | 2 / 0                                 | Mixed cellularity Hodgkin lymphoma<br>Psoriatic arthritis                                                                                                         |
| HLA-V            | 6          | 1 / 0                                 | Sarcoidosis (Lofgren's syndrome vs non-Lofgren's syndrome)                                                                                                        |
| MCCD1P1          | 6          | 1 / 0                                 | Non-small cell lung cancer                                                                                                                                        |
| HCG4P5           | 6          | 1 / 0                                 | Hemoglobin levels                                                                                                                                                 |
| HLA-A            | 6          | 2 / 0                                 | Blood protein levels<br>Hemoglobin levels                                                                                                                         |
| ZNRD1            | 6          | 1 / 0                                 | AIDS progression<br>Autism spectrum disorder, attention deficit-hyperactivity disorder, bipolar disorder, major depressive disorder, and schizophrenia (combined) |
| VDR              | 12         | 1 / 0                                 | Cardiovascular disease<br>Medication use (diuretics)                                                                                                              |
| SEPT9            | 17         | 1 / 0                                 | Cardiovascular disease<br>Heel bone mineral density<br>Medication use (diuretics)<br>Systolic blood pressure                                                      |

Table S6: **Previously reported traits associated with novel SNPs of pulse pressure from NHGRI GWAS Catalog.**

| Gene   | Chromosome | Number of SNPs ( $\beta_g / \tau_g$ ) | Trait(s)                                                                                                            |
|--------|------------|---------------------------------------|---------------------------------------------------------------------------------------------------------------------|
| EBF2   | 8          | 2 / 0                                 | Cardiovascular disease<br>Medication use (agents acting on the renin-angiotensin system)<br>Systolic blood pressure |
| SORCS3 | 10         | 1 / 0                                 | Systolic blood pressure                                                                                             |

Table S7: **Previously reported traits associated with novel SNPs of HDL from NHGRI GWAS Catalog.**

| Gene | Chromosome | Number of SNPs ( $\beta_g / \tau_g$ ) | Trait(s)                                                                                                                                                                                                                                                                                                                                                                                                                                                                                                                                                                     |
|------|------------|---------------------------------------|------------------------------------------------------------------------------------------------------------------------------------------------------------------------------------------------------------------------------------------------------------------------------------------------------------------------------------------------------------------------------------------------------------------------------------------------------------------------------------------------------------------------------------------------------------------------------|
| BCL2 | 18         | 1 / 0                                 | Body mass index<br>High light scatter reticulocyte count<br>Modified Stumvoll Insulin Sensitivity Index (BMI interaction)<br>Modified Stumvoll Insulin Sensitivity Index (model adjusted for BMI)<br>Reticulocyte count<br>Systolic blood pressure<br>Triglyceride levels<br>Triglycerides<br>Type 2 diabetes<br>Waist-hip ratio<br>Waist-to-hip ratio adjusted for BMI<br>Waist-to-hip ratio adjusted for BMI (adjusted for smoking behaviour)<br>Waist-to-hip ratio adjusted for BMI x sex x age interaction (4df test)<br>Waist-to-hip ratio adjusted for body mass index |

Table S8: Previously reported traits associated with novel SNPs of total cholesterol from NHGRI GWAS Catalog.

| Gene       | Chromosome | Number of SNPs ( $\beta_g / \tau_g$ ) | Trait(s)                                                                                                                                      |
|------------|------------|---------------------------------------|-----------------------------------------------------------------------------------------------------------------------------------------------|
| ZNRD1      | 6          | 1 / 0                                 | AIDS progression                                                                                                                              |
| TRIM31     | 6          | 1 / 0                                 | Autism spectrum disorder, attention deficit-hyperactivity disorder, bipolar disorder, major depressive disorder, and schizophrenia (combined) |
| TRIM31-AS1 | 6          | 2 / 0                                 | Beta-2 microglobulin plasma levels                                                                                                            |
|            |            |                                       | Beta-2 microglobulin plasma levels                                                                                                            |
|            |            |                                       | Cold sores                                                                                                                                    |
| TRIM15     | 6          | 1 / 0                                 | Blood protein levels                                                                                                                          |
| PAIP1P1    | 6          | 1 / 0                                 | Help-seeking from a GP (without major depressive disorder symptoms)                                                                           |
|            |            |                                       | Help-seeking from a psychiatrist                                                                                                              |
| TRIM26     | 6          | 5 / 0                                 | Asthma (adult onset)                                                                                                                          |
|            |            |                                       | Asthma (childhood onset)                                                                                                                      |
|            |            |                                       | Autism spectrum disorder, attention deficit-hyperactivity disorder, bipolar disorder, major depressive disorder, and schizophrenia (combined) |
|            |            |                                       | Help-seeking from a GP (without major depressive disorder symptoms)                                                                           |
|            |            |                                       | Help-seeking from a psychiatrist                                                                                                              |
|            |            |                                       | Medication use (anti-inflammatory and antirheumatic products, non-steroids)                                                                   |
|            |            |                                       | Schizophrenia                                                                                                                                 |
| HCG17      | 6          | 3 / 0                                 | General cognitive ability                                                                                                                     |
|            |            |                                       | LDL cholesterol levels                                                                                                                        |
| LPL        | 8          | 0 / 17                                | Apolipoprotein A1 levels                                                                                                                      |
|            |            |                                       | Apolipoprotein B levels                                                                                                                       |
|            |            |                                       | Cholesterol efflux capacity                                                                                                                   |
|            |            |                                       | Coronary artery disease                                                                                                                       |
|            |            |                                       | Eosinophil counts                                                                                                                             |
|            |            |                                       | HDL Cholesterol - Triglycerides (HDL-C-TG)                                                                                                    |
|            |            |                                       | HDL cholesterol                                                                                                                               |
|            |            |                                       | HDL cholesterol levels                                                                                                                        |
|            |            |                                       | HDL cholesterol levels in current drinkers                                                                                                    |
|            |            |                                       | HDL cholesterol levels x alcohol consumption (drinkers vs non-drinkers) interaction (2df)                                                     |
|            |            |                                       | HDL cholesterol levels x alcohol consumption (regular vs non-regular drinkers) interaction (2df)                                              |
|            |            |                                       | HDL cholesterol levels x long total sleep time interaction (2df test)                                                                         |
|            |            |                                       | HDL cholesterol levels x short total sleep time interaction (2df test)                                                                        |
|            |            |                                       | Height                                                                                                                                        |
|            |            |                                       | High density lipoprotein cholesterol levels                                                                                                   |
|            |            |                                       | Lipid metabolism phenotypes                                                                                                                   |
|            |            |                                       | Lipid traits                                                                                                                                  |
|            |            |                                       | Lipoprotein phospholipase A2 activity in cardiovascular disease                                                                               |
|            |            |                                       | Low density lipoprotein cholesterol levels                                                                                                    |
|            |            |                                       | Medication use (HMG CoA reductase inhibitors)                                                                                                 |
|            |            |                                       | Metabolic syndrome                                                                                                                            |
|            |            |                                       | Metabolic syndrome (bivariate traits)                                                                                                         |
|            |            |                                       | Metabolite levels                                                                                                                             |
|            |            |                                       | Parental longevity (father's age at death or father's attained age)                                                                           |
|            |            |                                       | Peripheral artery disease                                                                                                                     |
|            |            |                                       | Red cell distribution width                                                                                                                   |
|            |            |                                       | Serum metabolite levels                                                                                                                       |
|            |            |                                       | Serum metabolite levels (CMS)                                                                                                                 |
|            |            |                                       | Triacylglyceride levels                                                                                                                       |
|            |            |                                       | Triglyceride levels                                                                                                                           |
|            |            |                                       | Triglyceride levels in current drinkers                                                                                                       |
|            |            |                                       | Triglyceride levels x alcohol consumption (drinkers vs non-drinkers) interaction (2df)                                                        |
|            |            |                                       | Triglyceride levels x alcohol consumption (regular vs non-regular drinkers) interaction (2df)                                                 |
|            |            |                                       | Triglycerides                                                                                                                                 |

Triglycerides x physical activity interaction (2df test)  
Triglycerides-Blood Pressure (TG-BP)  
Type 2 diabetes  
Type 2 diabetes (adjusted for BMI)  
Waist-hip ratio  
Waist-to-hip ratio adjusted for BMI  
High density lipoprotein cholesterol levels

AC100802.3

8

0 / 1

---

Table S9: Previously reported traits associated with novel SNPs of triglycerides from NHGRI GWAS Catalog.

| Gene  | Chromosome | Number of SNPs ( $\beta_g / \tau_g$ ) | Trait(s)                                         |
|-------|------------|---------------------------------------|--------------------------------------------------|
| NR5A2 | 1          | 1 / 0                                 | Waist-hip ratio                                  |
| CCND2 | 12         | 1 / 0                                 | Appendicular lean mass                           |
|       |            |                                       | Birth weight                                     |
|       |            |                                       | Body mass index                                  |
|       |            |                                       | Cardiovascular disease                           |
|       |            |                                       | Heel bone mineral density                        |
|       |            |                                       | Height                                           |
|       |            |                                       | Low density lipoprotein cholesterol levels       |
|       |            |                                       | Medication use (HMG CoA reductase inhibitors)    |
|       |            |                                       | Medication use (drugs used in diabetes)          |
|       |            |                                       | Offspring birth weight                           |
|       |            |                                       | Pulse pressure                                   |
|       |            |                                       | Systolic blood pressure                          |
|       |            |                                       | Triglyceride levels                              |
|       |            |                                       | Type 2 diabetes                                  |
|       |            |                                       | Waist circumference adjusted for body mass index |

Table S10: Previously reported traits associated with novel SNPs of random glucose from NHGRI GWAS Catalog.

| Gene      | Chromosome | Number of SNPs ( $\beta_g / \tau_g$ ) | Trait(s)                                                                                                                                                                                                                                                                                                                                                                                                                                                                                                                                                                                                      |
|-----------|------------|---------------------------------------|---------------------------------------------------------------------------------------------------------------------------------------------------------------------------------------------------------------------------------------------------------------------------------------------------------------------------------------------------------------------------------------------------------------------------------------------------------------------------------------------------------------------------------------------------------------------------------------------------------------|
| HK1       | 10         | 6 / 0                                 | Apolipoprotein B levels<br>Glycated hemoglobin levels<br>HDL cholesterol levels<br>Hematocrit<br>Hemoglobin<br>Hemoglobin A1c levels<br>Hemoglobin concentration<br>Hemoglobin levels<br>High light scatter reticulocyte count<br>High light scatter reticulocyte percentage of red cells<br>Immature fraction of reticulocytes<br>LDL cholesterol levels<br>Low density lipoprotein cholesterol levels<br>Mean corpuscular hemoglobin<br>Mean corpuscular volume<br>Red blood cell count<br>Red blood cell traits<br>Red cell distribution width<br>Reticulocyte count<br>Reticulocyte fraction of red cells |
| CCND2     | 12         | 1 / 0                                 | Appendicular lean mass<br>Birth weight<br>Body mass index<br>Cardiovascular disease<br>Heel bone mineral density<br>Height<br>Low density lipoprotein cholesterol levels<br>Medication use (HMG CoA reductase inhibitors)<br>Medication use (drugs used in diabetes)<br>Offspring birth weight<br>Pulse pressure<br>Systolic blood pressure<br>Triglyceride levels<br>Type 2 diabetes<br>Waist circumference adjusted for body mass index                                                                                                                                                                     |
| CCND2-AS1 | 12         | 1 / 0                                 | Appendicular lean mass<br>Birth weight<br>Body mass index<br>Cardiovascular disease<br>Heel bone mineral density<br>Height<br>Low density lipoprotein cholesterol levels<br>Medication use (HMG CoA reductase inhibitors)<br>Medication use (drugs used in diabetes)<br>Offspring birth weight<br>Pulse pressure<br>Systolic blood pressure<br>Triglyceride levels<br>Type 2 diabetes<br>Waist circumference adjusted for body mass index                                                                                                                                                                     |



Table S11: Previously reported traits associated with novel SNPs of fasting glucose from NHGRI GWAS Catalog.

| Gene      | Chromosome | Number of SNPs ( $\beta_g / \tau_g$ ) | Trait(s)                                                                                                                                                                                                                                                                                                                                                                                                                                                                                                                                                                                                      |
|-----------|------------|---------------------------------------|---------------------------------------------------------------------------------------------------------------------------------------------------------------------------------------------------------------------------------------------------------------------------------------------------------------------------------------------------------------------------------------------------------------------------------------------------------------------------------------------------------------------------------------------------------------------------------------------------------------|
| WFS1      | 4          | 1 / 0                                 | Type 2 diabetes                                                                                                                                                                                                                                                                                                                                                                                                                                                                                                                                                                                               |
| ACSL1     | 4          | 4 / 0                                 | Type 2 diabetes                                                                                                                                                                                                                                                                                                                                                                                                                                                                                                                                                                                               |
| GPSM1     | 9          | 9 / 0                                 | Birth weight<br>Insulinogenic index<br>Offspring birth weight<br>Type 2 diabetes<br>Type 2 diabetes (adjusted for BMI)<br>Waist-to-hip ratio adjusted for BMI<br>White blood cell count                                                                                                                                                                                                                                                                                                                                                                                                                       |
| HK1       | 10         | 2 / 0                                 | Apolipoprotein B levels<br>Glycated hemoglobin levels<br>HDL cholesterol levels<br>Hematocrit<br>Hemoglobin<br>Hemoglobin A1c levels<br>Hemoglobin concentration<br>Hemoglobin levels<br>High light scatter reticulocyte count<br>High light scatter reticulocyte percentage of red cells<br>Immature fraction of reticulocytes<br>LDL cholesterol levels<br>Low density lipoprotein cholesterol levels<br>Mean corpuscular hemoglobin<br>Mean corpuscular volume<br>Red blood cell count<br>Red blood cell traits<br>Red cell distribution width<br>Reticulocyte count<br>Reticulocyte fraction of red cells |
| KCNQ1     | 11         | 2 / 0                                 | Birth weight<br>Type 2 diabetes                                                                                                                                                                                                                                                                                                                                                                                                                                                                                                                                                                               |
| CCND2     | 12         | 1 / 0                                 | Appendicular lean mass<br>Birth weight<br>Body mass index<br>Cardiovascular disease<br>Heel bone mineral density<br>Height<br>Low density lipoprotein cholesterol levels<br>Medication use (HMG CoA reductase inhibitors)<br>Medication use (drugs used in diabetes)<br>Offspring birth weight<br>Pulse pressure<br>Systolic blood pressure<br>Triglyceride levels<br>Type 2 diabetes<br>Waist circumference adjusted for body mass index                                                                                                                                                                     |
| CCND2-AS1 | 12         | 1 / 0                                 | Appendicular lean mass<br>Birth weight<br>Body mass index<br>Cardiovascular disease<br>Heel bone mineral density<br>Height<br>Low density lipoprotein cholesterol levels<br>Medication use (HMG CoA reductase inhibitors)<br>Medication use (drugs used in diabetes)<br>Offspring birth weight<br>Pulse pressure<br>Systolic blood pressure<br>Triglyceride levels<br>Type 2 diabetes<br>Waist circumference adjusted for body mass index                                                                                                                                                                     |
| ZHX3      | 20         | 2 / 0                                 | Balding type 1<br>Depressive symptoms (MTAG)<br>Fasting blood glucose adjusted for BMI<br>Heel bone mineral density<br>Height<br>Male-pattern baldness<br>Resting heart rate<br>Type 2 diabetes<br>Type 2 diabetes (adjusted for BMI)                                                                                                                                                                                                                                                                                                                                                                         |

# Supplementary Methods

## A WiSER Score Test

In this section we derive the score test for the WiSER model. Let  $\mathbf{X}_{i,1} \in \mathbb{R}^{n_i \times r_1}$  be the covariates to be tested for the mean component of subject  $i$ , and  $\mathbf{W}_{i,1} \in \mathbb{R}^{n_i \times r_2}$  be the covariates to be tested for the WS variability of subject  $i$ . Let  $r = r_1 + r_2$  and  $\tilde{\boldsymbol{\theta}} = (\mathbf{0}_r, \hat{\boldsymbol{\theta}}_2)^T \in \mathbb{R}^{r+p+\ell+q(q+1)/2}$ , where  $\hat{\boldsymbol{\theta}}_2 = (\boldsymbol{\beta}^T, \boldsymbol{\tau}^T, \mathbf{vech}(\mathbf{L}_\gamma^T))^T$  is the WiSER estimator under the null model, where  $\mathbf{vech}$  is the half-vectorization function and  $\mathbf{L}_\gamma$  is the Cholesky factor of  $\boldsymbol{\Sigma}_\gamma$ . We use  $\boldsymbol{\psi}_{H_1} \in \mathbb{R}^r$  and  $\boldsymbol{\psi}_{H_0} \in \mathbb{R}^{p+\ell+q(q+1)/2}$  to represent the gradient vectors derived under the full model and the null model respectively. Then the chi-square score test statistic for testing  $\boldsymbol{\theta}_1 = \mathbf{0}_r$  takes the form

$$S = \frac{1}{m} \left[ \boldsymbol{\psi}_{H_1}(\tilde{\boldsymbol{\theta}}) \right]^T \mathbf{V}_{\boldsymbol{\psi}_{H_1}(\tilde{\boldsymbol{\theta}})}^{-1} \left[ \sum_i \boldsymbol{\psi}_{H_1}(\tilde{\boldsymbol{\theta}}) \right],$$

where  $\mathbf{V}_{\boldsymbol{\psi}_{H_1}(\tilde{\boldsymbol{\theta}})}$  is the covariance matrix of score  $\boldsymbol{\psi}_{H_1}(\tilde{\boldsymbol{\theta}})$ . The score test statistic  $S$  is asymptotically distributed as  $\chi_r^2$  under  $H_0$ . The score is given by  $\boldsymbol{\psi}_{H_1}(\tilde{\boldsymbol{\theta}}) = \sum_{i=1}^n \boldsymbol{\psi}_{iH_1}(\tilde{\boldsymbol{\theta}})$ , where  $\boldsymbol{\psi}_{iH_1}(\tilde{\boldsymbol{\theta}})$  is estimated by

$$\hat{\boldsymbol{\psi}}_{iH_1}(\tilde{\boldsymbol{\theta}}) = \left( -\mathbf{W}_{i,1}^T \text{diag} \left[ \begin{array}{c} e^{\mathbf{w}_{i1}^T \hat{\boldsymbol{\tau}}} \\ \vdots \\ e^{\mathbf{w}_{in_i}^T \hat{\boldsymbol{\tau}}} \end{array} \right] \begin{array}{c} \mathbf{X}_{i,1}^T [\mathbf{V}_i^{(0)}]^{-1} \hat{\mathbf{r}}_i \\ \vdots \\ \left( \mathbf{V}_i^{(0)} \right)^{-1} \hat{\mathbf{R}}_i \left( \mathbf{V}_i^{(0)} \right)^{-1} \end{array} \right) \in \mathbb{R}^r,$$

where  $\hat{\mathbf{r}}_i$ ,  $\hat{\mathbf{R}}_i$ , and  $\hat{\boldsymbol{\tau}}$  are from the fitted null model. For genotypes, which is assumed to be constant through time, it reduces to a scalar  $S_{\beta_g}$  for testing  $\beta_g = 0$  ( $r_1 = 1$  and  $r_2 = 0$ ), and  $S_{\tau_g}$  for testing  $\tau_g = 0$  ( $r_1 = 0$  and  $r_2 = 1$ ).

To calculate  $\hat{\mathbf{V}}_{\boldsymbol{\psi}_{H_1}(\tilde{\boldsymbol{\theta}})}$ , we note that from Boos and Stefanski Chapter 7,<sup>1</sup>  $\mathbf{V}_{\boldsymbol{\psi}_{H_1}(\tilde{\boldsymbol{\theta}})}$  can be represented by

$$\mathbf{V}_{\boldsymbol{\psi}_{H_1}(\tilde{\boldsymbol{\theta}})} = \mathbf{B}_{11} - \mathbf{A}_{12} \mathbf{A}_{22}^{-1} \mathbf{B}_{21} - \mathbf{B}_{12} \mathbf{A}_{22}^{-1} \mathbf{A}_{21} + \mathbf{A}_{12} \mathbf{A}_{22}^{-1} \mathbf{B}_{22} \mathbf{A}_{22}^{-1} \mathbf{A}_{21} \in \mathbb{R}^{r \times r},$$

where

$$\mathbf{A}(\tilde{\boldsymbol{\theta}}) = \mathbb{E} \left[ -\frac{\partial \boldsymbol{\psi}}{\partial \tilde{\boldsymbol{\theta}}} \right] = \begin{bmatrix} \mathbf{A}_{11} & \mathbf{A}_{12} \\ \mathbf{A}_{21} & \mathbf{A}_{22} \end{bmatrix}$$

and

$$\mathbf{B}(\tilde{\boldsymbol{\theta}}) = \mathbb{E} \left[ \boldsymbol{\psi} \boldsymbol{\psi}^T \right] = \begin{bmatrix} \mathbf{B}_{11} & \mathbf{B}_{12} \\ \mathbf{B}_{21} & \mathbf{B}_{22} \end{bmatrix}.$$

Here  $\boldsymbol{\psi} = \begin{bmatrix} \boldsymbol{\psi}_{H_1} \\ \boldsymbol{\psi}_{H_0} \end{bmatrix}$ ,  $\mathbf{A}_{11}$ ,  $\mathbf{B}_{11} \in \mathbb{R}^{r \times r}$ ,  $\mathbf{A}_{12}$ ,  $\mathbf{B}_{12} \in \mathbb{R}^{r \times [p+\ell+q(q+1)/2]}$ , and  $\mathbf{A}_{22}$ ,  $\mathbf{B}_{22} \in \mathbb{R}^{[p+\ell+q(q+1)/2] \times [p+\ell+q(q+1)/2]}$ .  $\hat{\mathbf{A}}_{22}^{-1}$  and  $\hat{\mathbf{A}}_{22}^{-1} \hat{\mathbf{B}}_{22} \hat{\mathbf{A}}_{22}^{-1}$  are readily available from the estimation and inference of the null model.

$\mathbf{A}_{22}$  is estimated from the Fisher Information Matrix of the null model and  $\mathbf{B}_{22}$  is estimated from the null model as

$$\hat{\mathbf{B}}_{22} = \frac{1}{m} \sum_{i=1}^m \hat{\boldsymbol{\psi}}_{iH_0}(\hat{\boldsymbol{\theta}}_2) \hat{\boldsymbol{\psi}}_{iH_0}^T(\hat{\boldsymbol{\theta}}_2) \in \mathbb{R}^{[p+\ell+q(q+1)/2] \times [p+\ell+q(q+1)/2]},$$

where  $\boldsymbol{\psi}_{iH_0}(\hat{\boldsymbol{\theta}}_2)$  is the score vector under the null model for sample  $i$ . We estimate  $\mathbf{B}_{11}$  by

$$\hat{\mathbf{B}}_{11} = \frac{1}{m} \sum_{i=1}^m \hat{\boldsymbol{\psi}}_{iH_1}(\tilde{\boldsymbol{\theta}}) \hat{\boldsymbol{\psi}}_{iH_1}^T(\tilde{\boldsymbol{\theta}}) \in \mathbb{R}^{r \times r}$$

and  $\mathbf{B}_{12}$  by

$$\hat{\mathbf{B}}_{12} = \frac{1}{m} \sum_{i=1}^m \hat{\boldsymbol{\psi}}_{iH_1}(\tilde{\boldsymbol{\theta}}) \hat{\boldsymbol{\psi}}_{iH_0}^T(\tilde{\boldsymbol{\theta}}) \in \mathbb{R}^{r \times [p+\ell+q(q+1)/2]}.$$

Let

$$\widehat{\mathbf{A}}_{i,21} = \begin{pmatrix} \mathbf{X}_i^T [\mathbf{V}_i^{(0)}]^{-1} \mathbf{X}_{i,1} & \mathbf{O}_{p \times r_2} \\ \mathbf{O}_{\ell \times r_1} & \mathbf{W}_i^T \begin{pmatrix} e^{\mathbf{w}_{i1}^T \widehat{\boldsymbol{\tau}}} & & \\ & \ddots & \\ & & e^{\mathbf{w}_{in_i}^T \widehat{\boldsymbol{\tau}}} \end{pmatrix} (\mathbf{V}_i^{(0)})^{-1} \widehat{\mathbf{R}}_i (\mathbf{V}_i^{(0)})^{-1} \begin{pmatrix} e^{\mathbf{w}_{i1}^T \widehat{\boldsymbol{\tau}}} & & \\ & \ddots & \\ & & e^{\mathbf{w}_{in_i}^T \widehat{\boldsymbol{\tau}}} \end{pmatrix} \mathbf{W}_{i,1} \\ \mathbf{O}_{[q(q+1)/2] \times r_1} & 2\mathbf{C}_q^T \cdot \left( \boldsymbol{\ell}_i^T \mathbf{Z}_i^T (\mathbf{V}_i^{(0)})^{-1} \odot \mathbf{Z}_i^T (\mathbf{V}_i^{(0)})^{-1} \right) \cdot \begin{pmatrix} e^{\mathbf{w}_{i1}^T \widehat{\boldsymbol{\tau}}} & & \\ & \ddots & \\ & & e^{\mathbf{w}_{in_i}^T \widehat{\boldsymbol{\tau}}} \end{pmatrix} \cdot \mathbf{W}_{i,1} \end{pmatrix}$$

$\in \mathbb{R}^{[p+\ell+q(q+1)/2] \times r}$ ,

where  $\odot$  represents the Khatri-Rao (column-wise Kronecker) product, and  $\mathbf{C}_q \in \mathbb{R}^{q^2 \times q(q+1)/2}$  is the copy matrix such that  $\mathbf{C}_q \text{vech} \mathbf{M} = \text{vec} \mathbf{M}$ , the vectorization of  $\mathbf{M}$ . The estimates  $\widehat{\boldsymbol{\tau}}$  and  $\widehat{\mathbf{R}}_i$  are from the fitted null model. We estimate  $\mathbf{A}_{21} = \mathbf{A}_{12}^T$  by

$$\widehat{\mathbf{A}}_{21} = \frac{1}{m} \sum_{i=1}^m \widehat{\mathbf{A}}_{i,21}.$$

## B Derivation of saddlepoint approximation (SPA)

The score test statistic for testing  $\beta_g$  is

$$S_{\beta_g} = \sum_{i=1}^m g_i \left\{ \mathbf{1}_{n_i}^T [\mathbf{V}_i^{(0)}]^{-1} \widehat{\mathbf{r}}_i \right\} =: \mathbf{g}^T \mathbf{c}_{\beta_g}, \quad (1)$$

where  $\mathbf{g}$  is the normalized genotype vector. The score test statistic for testing  $\tau_g$  is

$$S_{\tau_g} = - \sum_{i=1}^m g_i \left[ \mathbf{1}_{n_i}^T \text{diag} \left[ \begin{pmatrix} e^{\mathbf{w}_{i1}^T \widehat{\boldsymbol{\tau}}} & & \\ & \ddots & \\ & & e^{\mathbf{w}_{in_i}^T \widehat{\boldsymbol{\tau}}} \end{pmatrix} (\mathbf{V}_i^{(0)})^{-1} \widehat{\mathbf{R}}_i (\mathbf{V}_i^{(0)})^{-1} \right] \right] =: \mathbf{g}^T \mathbf{c}_{\tau_g}. \quad (2)$$

First, we construct the empirical cumulant generating function (CGF) of  $\mathbf{c} \in \{\mathbf{c}_{\tau_g}, \mathbf{c}_{\beta_g}\}$ . The empirical moment generating function (MGF) of  $\mathbf{c}$  is

$$\widehat{M}_0(z) := \frac{1}{m} \sum_{i=1}^m \exp(c_i z)$$

with the first two derivatives

$$\widehat{M}'_0(z) = \frac{1}{m} \sum_{i=1}^m c_i \exp(c_i z), \quad \widehat{M}''_0(z) = \frac{1}{m} \sum_{i=1}^m c_i^2 \exp(c_i z).$$

The empirical CGF of  $\mathbf{c}$  is defined as the logarithm of empirical MGF,  $\widehat{K}_0(z) = \log \widehat{M}_0(z)$ . Its first two derivatives are

$$\widehat{K}'_0(z) = \frac{\widehat{M}'_0(z)}{\widehat{M}_0(z)}, \quad \widehat{K}''_0(z) = \frac{\widehat{M}''_0(z) \widehat{M}_0(z) - [\widehat{M}'_0(z)]^2}{[\widehat{M}_0(z)]^2}.$$

Then, the empirical CGF and the first two derivatives of the observed score  $S = \sum_{i=1}^m g_i c_i$  are

$$\widehat{K}(z) = \sum_{i=1}^m \widehat{K}_0(g_i z), \quad \widehat{K}'(z) = \sum_{i=1}^m g_i \widehat{K}'_0(g_i z), \quad \text{and} \quad \widehat{K}''(z) = \sum_{i=1}^m g_i^2 \widehat{K}''_0(g_i z).$$

To apply the saddlepoint approximation for an observed score  $S = s$ , we first find a “saddlepoint”  $\zeta$  such that  $\widehat{K}'(\zeta) = s$  and retrieve

$$\begin{aligned}\omega &= \text{sign}(\zeta)\sqrt{2(\zeta s - \widehat{K}(\zeta))}, \\ \nu &= \zeta\sqrt{\widehat{K}''(\zeta)}.\end{aligned}$$

The cumulative distribution function of  $S$  at  $s$  is approximated by

$$P(S < s) \approx \Phi\left(\omega + \frac{1}{\omega}\log\left(\frac{\nu}{\omega}\right)\right),$$

where  $\Phi(\cdot)$  denotes the cumulative distribution function of the standard normal distribution<sup>2</sup>. The p value for the score test with the statistic  $S = s$  is given by  $P(S < -|s|) + (1 - P(S < |s|))$ .

## C Heuristic method inflates the type I error

Failure to properly control for time-varying covariates that are correlated with genotypes can lead to biased results. We conduct a small scale simulation in order to demonstrate this. The heuristic approach involves regressing per-subject residual standard deviations on a set of covariates. We simulate data from Model (1) and Model (2). We set  $\boldsymbol{\beta}_{\text{true}} = (0.1, 6.5, 0.0, 1.0, 5.0)^T$ ,  $\boldsymbol{\tau}_{\text{true}} = (0.0, 0.3, 0.0, 0.5, 0.25)^T$ , and the covariance of  $(\gamma_i, \omega_i)$  to be

$$\boldsymbol{\Sigma}_{\boldsymbol{\gamma}\boldsymbol{\omega}} = \begin{pmatrix} 2.0 & 0.0 & 0.2 \\ 0.0 & 1.2 & 0.1 \\ 0.2 & 0.1 & 1.0 \end{pmatrix}.$$

For each subject, the mean level covariates  $\mathbf{X}$  are the same as the WS variability covariates  $\mathbf{W}$ .  $W_1$  is the intercept.  $W_2$  and  $W_3$  are time-invariant covariates with effect sizes  $\tau_2 = 0.3$  and  $\tau_3 = 0.0$  respectively.  $W_2$  acts as sex and is drawn from Bernoulli(0.5) per subject.  $W_3$  is the simulated genotype with MAF = 0.3 following Hardy-Weinberg equilibrium.  $W_4$  is a time-varying covariate with effect size  $\tau_4 = 0.5$ ; it is correlated with  $W_3$  (the genotype) with its entries generated from  $N(0, 0.5) \cdot I\{W_3 < 0\} + N(0, 2) \cdot I\{W_3 > 0\}$ .  $W_5$  is time-varying with entries generated from independent standard normals. Since the heuristic method involves one outcome per subject, time-varying covariates cannot be incorporated as-is, so we use their per-subject mean to control for them.

Figure S1 displays the  $-\log_{10}(\text{p value})$  of  $\tau_3$  (the genotype with no effect on WS variability) based on 100 replicates per scenario with a sample size of 6,000. The number of repeated measurements per subject range from 5 to 20. The heuristic method leads to significantly inflated type I error. Inadequately controlling for time-varying covariates results in false positives when using standard deviation of the residuals as the outcome.

## D Clinical measurement extraction from the UK Biobank primary data

We extract HbA1c data using the HbA1c code list by Denaxas et al.<sup>3</sup>, omitting the terms: 42c and 44TC (tests of HbA1), XE24t (no occurrences), and X80U3 (no values accompanying term). We convert between DCCT (Diabetes Control and Complications Trial) align and IFCC (International Federation of Clinical Chemistry) standardized measurements, and keep values between 4-18% (20-173 mmol/mol). The distribution of resulting values is then compared against that of HbA1c available from UK Biobank field 30750.

To extract blood pressure records, we require values to be specified as systolic or diastolic in pairs. We look for codes relating to blood pressure or primary hypertension in “read v2” and “CTV3 (read v3)” dictionaries, and exclude codes related to ambulatory care or hypertension secondary to a transient cause. The terms included are 246., 2461 - 2467, 2469, 246[A-G], 246J, 246N, 246[P-S], 246[V-Y], 246c, 246d, 246g, XaF4F, XaF4L, XaF4O, XaF4S,

XaF4a, XaF4b, XaJ2[E-H], XaKfw, XaKfx, and G20.. All units are assumed to be mmHg. Blood pressure readings are assigned as diastolic or systolic according to the attached term, where possible. Otherwise, where two unique values are given for an individual and date, the higher is assumed to be the systolic blood pressure, while the lower is assumed to be the diastolic blood pressure. For all pairs of blood pressure readings, systolic blood pressure is required to lie between 45 and 300, diastolic blood pressure is required to be greater than 30 mmHg but less than the associated systolic blood pressure. The distribution of resulting values is compared against that of systolic and diastolic blood pressure from UK Biobank field numbers 93 and 94, respectively.

HDL cholesterol is extracted from primary care using the code list prepared by Denaxas et al.<sup>3</sup>, with the addition of terms XaEVr (Plasma HDL cholesterol level), 44d2 (Plasma random HDL cholesterol level), 44d3 (Plasma fasting HDL cholesterol level), and X772M (High density lipoprotein cholesterol level). Units are assumed to be mmol/L, and the records (n=819) that explicitly indicate a different unit are excluded. Values are required to be less than 10. The distribution of resulting values is compared against that of HDL cholesterol values from UK Biobank field number 30760.

LDL cholesterol is extracted from primary care using terms 44P6, 44PD, 44PE, 44d4, 44d5, and XaEVs. Units are assumed to be mmol/L, and the records (n=21) that explicitly indicated a different unit are excluded. Values are required to be less than 30. The distribution of resulting values is compared against that of LDL cholesterol values from UK Biobank field number 30780.

Total cholesterol is extracted from primary care using the code list prepared by Denaxas et al.<sup>3</sup>, with the addition of terms XaFs9 (Fasting cholesterol level) and XaIRd (Plasma total cholesterol level). Units are assumed to be mmol/L. Records (n=45) that explicitly indicate a different unit are excluded. Values are required to be less than 30. The distribution of resulting values is compared against that of total cholesterol values from UK Biobank field number 30690. Triglyceride records are extracted from primary care using the code list prepared by Denaxas et al.<sup>3</sup>, with the addition of the code X772O (Triglyceride level) and the code prefix 44e (Plasma triglyceride level). Units are assumed to be mmol/L, and the records (n=249) that explicitly indicate a different unit are excluded. Values are required to be less than 30. The distribution of resulting values is compared against that of triglyceride levels from UK Biobank field number 30870.

Serum and plasma random glucose levels are extracted from primary care data using codes 44TA, 44f., 44f0, 44g., 44g0, and XM0ly. Serum and plasma fasting glucose levels are extracted using codes 44f1 and 44g1. Units are assumed to be mmol/L, and records (n=39) that explicitly indicate a different unit are excluded. Values are required to be less than 60. The distribution of random glucose is compared against that of glucose from UK Biobank field number 30740.

BMI is extracted from primary care using codes XaCDR, XaJJH, XaJqk, XaZcl, and prefix 22K. Values are required to lie between 12 and 75 kg/m<sup>2</sup>. Height records are extracted using code prefix 229, and values are required to lie between 125 and 210 cm. Weight records are extracted using codes X76CG, XM01G, XE1h4, Xa7wI, 1622, and prefix 22A. Values are required to lie between 30 and 200 kg. Height, weight, and BMI measures are then matched by individual and date. Missing values for height are filled in from previous or subsequent measurements, where possible. BMI is calculated from height and weight at each date. If a value for BMI is already recorded for that individual and date, and the reported BMI differs from the calculated BMI by more than 1.5 (0.27% of records), both measures are excluded, otherwise, the calculated BMI is retained. If a BMI record is reported for a date where height or weight is not available, the reported BMI is retained.

## E Covariate adjustment for $\beta_g$ and $\tau_g$ in UK Biobank TrajGWAS analyses

- Blood pressures, i.e., SBP, DBP, and PP (if on medication, add 15 mmHg for SBP, 10 mmHg for DBP, and 5 mmHg for PP<sup>4</sup>)
  - $\beta_g$ : age, age<sup>2</sup>, sex, age×sex, 10 PCs;

- $\tau_g$ : age, age<sup>2</sup>, sex, age×sex
- HDL (if on medication, -0.060 mmol/L<sup>5</sup>)
  - $\beta_g$ : age, age<sup>2</sup>, BMI, sex, age×BMI, age×sex, 10 PCs
  - $\tau_g$ : age, age<sup>2</sup>, BMI, sex, age×BMI, age×sex
- LDL (if on medication, add 1.290 mmol/L<sup>5</sup>)
  - $\beta_g$ : age, age<sup>2</sup>, BMI, sex, age×BMI, age×sex, 10 PCs
  - $\tau_g$ : age, age<sup>2</sup>, BMI, sex, age×BMI, age×sex
- Total cholesterol (if on medication, add 1.347 mmol/L<sup>5</sup>)
  - $\beta_g$ : age, age<sup>2</sup>, BMI, sex, age×BMI, age×sex, 10 PCs
  - $\tau_g$ : age, age<sup>2</sup>, BMI, sex, age×BMI, age×sex
- Triglycerides (if on medication, add 0.208 mmol/L<sup>5</sup>)
  - $\beta_g$ : age, age<sup>2</sup>, BMI, sex, age×BMI, age×sex, cholestrol\_drug, 10 PCs
  - $\tau_g$ : age, age<sup>2</sup>, BMI, sex, age×BMI, age×sex, cholestrol\_drug
- Glucose, i.e., fasting glucose and random glucose
  - $\beta_g$ : age, age<sup>2</sup>, BMI, sex, age×BMI, age×sex, self\_insulin, diabetes\_status, 10 PCs
  - $\tau_g$ : age, age<sup>2</sup>, BMI, sex, age×BMI, age×sex, diabetes\_status
- HbA1c
  - $\beta_g$ : age, age<sup>2</sup>, BMI, sex, age×BMI, age×sex, diabetes\_status, self\_insulin, 10 PCs
  - $\tau_g$ : age, age<sup>2</sup>, BMI, sex, age×BMI, age×sex, diabetes\_status
- BMI
  - $\beta_g$ : age, age<sup>2</sup>, sex, age×sex, 10 PCs
  - $\tau_g$ : age, age<sup>2</sup>, sex, age×sex

## F Considerations of Diabetes Diagnosis in TrajGWAS Analysis

One of the advantages of TrajGWAS is that it can incorporate time-varying covariates, e.g., diseases developed after the first observation. To fully explore how the occurrence of the related disease influences the genetic contribution to WS variability, we now include disease status as a time-varying covariates. We extracted first occurrence of diabetes from their primary care, hospital records, and registry data and include it as a time-varying covariate when analyzing HbA1c, given that HbA1c has abundant sample size as well as the larger number of repeated measurements than glucose measures. We compare the results with the those when including disease status as a time-fixed covariate.

For time-varying indicator, we use 0 for measurements before first diagnosis of diabetes, and 1 for measurements after the diagnosis. Percentage of observations after the diagnosis averaged over subjects is 95.8%. 66.6% of the subjects had all the observations after the diagnosis, and 85.1% had at least 75% of the observations after the diagnosis. Histogram of proportion of observation after diagnosis is shown in Figure S25. The results with time-varying indicator have magnified some of the signals compared to constant indicator, as shown in Figures S26-S27. For  $\beta_g$ , the SNPs magnified in Chromosome 2 maps to *THADA* (OMIM: 611800)<sup>6,7</sup>, the one on Chromosome 8 to *SLC30A8* (OMIM: 611145)<sup>8,9</sup>, and the last peak of Chromosome 10 to *TCF7L2* (OMIM: 602228), all of which are reported to be highly correlated to type 2 diabetes, glycemic changes, and beta-cell function.

## Supplemental References

1. Boos, D. D. and Stefanski, L. A. (2013). *Essential Statistical Inference*. Springer Texts in Statistics, Springer, New York. Theory and methods.
2. Barndorff-Nielsen, O. E. (1990). Approximate interval probabilities. *Journal of the Royal Statistical Society: Series B (Methodological)* 52, 485–496.
3. Denaxas, S., Shah, A. D., Mateen, B. A., Kuan, V., Quint, J. K., Fitzpatrick, N., Torralbo, A., Fatemifar, G., and Hemingway, H. (2020). A semi-supervised approach for rapidly creating clinical biomarker phenotypes in the UK Biobank using different primary care EHR and clinical terminology systems. *JAMIA Open* 3, 545–556.
4. Nierenberg, J. L., Anderson, A. H., He, J., Parsa, A., Srivastava, A., Cohen, J. B., Saraf, S. L., Rahman, M., Rosas, S. E., Kelly, T. N. *et al.* (2021). Association of blood pressure genetic risk score with cardiovascular disease and CKD progression: Findings from the CRIC study. *Kidney360* 2, 1251–1260.
5. Wu, J., Province, M. A., Coon, H., Hunt, S. C., Eckfeldt, J. H., Arnett, D. K., Heiss, G., Lewis, C. E., Ellison, R. C., Rao, D. C. *et al.* (2007). An investigation of the effects of lipid-lowering medications: genome-wide linkage analysis of lipids in the hypergen study. *BMC Genetics* 8, 1–9.
6. Simonis-Bik, A. M., Nijpels, G., van Haeften, T. W., Houwing-Duistermaat, J. J., Boomsma, D. I., Reiling, E., van Hove, E. C., Diamant, M., Kramer, M. H., Heine, R. J. *et al.* (2010). Gene variants in the novel type 2 diabetes loci *cdc123/camk1d*, *thada*, *adamts9*, *bcl11a*, and *mtnr1b* affect different aspects of pancreatic  $\beta$ -cell function. *Diabetes* 59, 293–301.
7. Thomsen, S. K., Ceroni, A., van de Bunt, M., Burrows, C., Barrett, A., Scharfmann, R., Ebner, D., McCarthy, M. I., and Gloyn, A. L. (2016). Systematic functional characterization of candidate causal genes for type 2 diabetes risk variants. *Diabetes* 65, 3805–3811.
8. Flannick, J., Thorleifsson, G., Beer, N. L., Jacobs, S. B., Grarup, N., Burt, N. P., Mahajan, A., Fuchsberger, C., Atzmon, G., Benediktsson, R. *et al.* (2014). Loss-of-function mutations in *slc30a8* protect against type 2 diabetes. *Nature Genetics* 46, 357–363.
9. Wang, T., Liu, H., Wang, L., Huang, T., Li, W., Zheng, Y., Heianza, Y., Sun, D., Leng, J., Zhang, S. *et al.* (2016). Zinc-associated variant in *slc30a8* gene interacts with gestational weight gain on postpartum glycaemic changes: a longitudinal study in women with prior gestational diabetes mellitus. *Diabetes* 65, 3786–3793.
